# Supplementary material for: Gastric microbial community profiling reveals a dysbiotic cancer-associated microbiota
Source: PubMed Central journal article supplement (PMC5868293; doi:10.1136/gutjnl-2017-314205), 2017-11-04
Supplement: gutjnl-2017-314205supp001.pdf [file gutjnl-2017-314205supp001.pdf]

## **Gastric microbial community profiling reveals a dysbiotic cancer-associated microbiota**

Rui M. Ferreira<sup>1,2</sup>, Joana Pereira-Marques<sup>1,2,3</sup>, Ines Pinto-Ribeiro<sup>1,2,4</sup>, Jose L. Costa<sup>1,2,4</sup>, Fatima Carneiro<sup>1,2,4,5</sup>, Jose C. Machado<sup>1,2,4</sup>, Ceu Figueiredo<sup>1,2,4\*</sup>

<sup>1</sup>i3S - Instituto de Investigação e Inovação em Saúde, Universidade do Porto, Porto, Portugal;

<sup>2</sup>Ipitimup - Institute of Molecular Pathology and Immunology of the University of Porto, Porto, Portugal; <sup>3</sup>ICBAS - Institute of Biomedical Sciences Abel Salazar, University of Porto, Portugal;

<sup>4</sup>Faculty of Medicine of the University of Porto, Porto, Portugal; and <sup>5</sup>Department of Pathology, Centro Hospitalar São João, Porto, Portugal

### **SUPPLEMENTARY MATERIAL**

## SUPPLEMENTARY MATERIALS AND METHODS

### ***Helicobacter pylori* detection**

DNA extracted from gastric tissue was used for *H. pylori* detection by amplification of the *vacA* and *cagA* genes, using biotin-labeled primers as previously described.[1] The detection of amplicons was performed by reverse hybridization onto a line probe assay (Labo Bio-Medical Products, Rijswijk, The Netherlands). DNA of *H. pylori* strains with known genotypes were used as templates for positive and negative controls.

### **16S rRNA gene sequencing**

The PCR reactions were performed in 25µL containing 1X AmpliTaq Gold 360 Master Mix (Applied Biosystems, Foster City, CA) and 0.4µM of forward and reverse primers. PCR was performed with 9 min of predenaturation at 95°C, followed by 25 cycles of 30 seconds at 95°C, 45 seconds at 52°C, and 45 seconds at 72°C. Final extension was performed for 10 minutes at 72°C.

Amplicons of approximately 280 bp were visualized and purified using the E-Gel SizeSelect Agarose Gels (Life Technologies, Foster City, CA), their concentration was determined with Qubit dsDNA HS Assay Kit (Life Technologies) and the respective size distribution with Qiaxcel DNA screening (Qiagen, Germany). Equal concentrations were used for library preparation to incorporate adaptor and barcode sequences. Next-generation sequencing was performed in the Ion PGM Torrent platform using Ion 316v2 Chips (Life, Technologies), following manufacturer's protocols. Briefly, 50ng of amplified DNA was used to ligate the Ion Torrent A (containing the sequencing primer ligation site) and P1 adaptors (the site for Ion Sphere Particles-ISP ligation). Afterwards, the DNA molecules entered in a process of clonal amplification through an emulsion PCR (emPCR) using the OneTouch2 instrument (Ion Torrent, Life Technologies). During emPCR single DNA fragments become bound via the specific adaptor to single ISPs. This process leads to coating of each ISP with millions of copies of a single DNA fragment. To ensure only coated ISPs proceed for sequencing, an enrichment step was performed using the OneTouch ES instrument (Ion Torrent, Life Technologies). PCR negative controls containing Microbial DNA-free water

(Qiagen), instead of DNA were processed as above mentioned. Data were deposited in Sequence Read Archive (PRJNA413125).

### ***Target re-sequencing quality control***

The number of spurious OTUs and the number of biological meaningful OTUs were obtained according to similarity shared with sequences of the Greengenes Named Isolated database (Supplementary Figure S2).[2] OTUs were classified as “Named” ( $\geq 97\%$  match from the reference database), “Chimeric” ( $<97\%$  match to the reference database and chimeric with high confidence) and “Missing” ( $<97\%$  match with low confidence or a biological sequence missing from the database). Consistency in the values determined for alpha-diversity, beta-diversity and relative abundances of *Proteobacteria*, *Firmicutes*, *Bacteroidetes* and *Fusobacteria* across amplification and sequencing sets were evaluated by intraclass correlation coefficient in 32 samples derived from 12 chronic gastritis and 4 gastric carcinoma subjects (Supplementary Table S3).

### ***NGS data analysis of the Chinese and Mexican validation cohorts***

The gastric carcinoma raw paired-end reads of the 16S rRNA gene of the V3-V4 region were downloaded in FASTQ format from Sequence Read Archive (SRA) from the study SRP080738 (BioProject PRJNA310127). In total 80 samples from China and 54 samples from Mexico were downloaded. Reads were analysed using the UPARSE pipeline, as described for the discovery cohort. Chimeric reads were reference-removed using Uchime. Each OTU was taxonomically assigned using Uclust, considering a minimum of 90% of similarity to a reference database (Greengenes Named Isolate database, release August 2013). After quality filtering, OTU construction, chimera filtering, and removal of non-bacteria sequences, two samples (one from each cohort) were removed due to low number of reads ( $< 1000$  sequences). The final set comprised 79 gastric cancer samples from China and 53 from Mexico (Supplementary Table S2). Noteworthy, the number of reads that could not be assigned to bacteria in these datasets were remarkably high (47.8% and 38.2% for China and Mexico, respectively) in comparison to those observed in the Portuguese discovery cohort (0.38%).

### **Real-time quantitative PCR (qPCR)**

qPCR assays were performed using PowerUp SYBR Green Master Mix (Applied Biosystems) using different sets of primers. Two different assays were used for quantification, a universal assay (composed by universal primers targeting a conserved region of the 16S rRNA gene) and a specific assay (composed by genus-specific primers targeting the 16S rRNA gene) (Supplementary Table S2). The assays were designed to obtain the highest degree of specificity by comparison with sequences of Greengenes Named Isolate (release August 2013).

qPCR mixtures were prepared to a final volume of 10  $\mu$ L, containing 1x PowerUp SYBR Green Master Mix, 1  $\mu$ M of forward and reverse primers (Invitrogen, Foster City, CA), 2  $\mu$ L of Microbial DNA-Free Water (Qiagen) and 1  $\mu$ L of DNA. The qPCR was performed in a 7500 Fast Real-Time PCR System (Applied Biosystems) with the following conditions: 2 minutes at 50°C, 10 minutes at 95°C, followed by 40 cycles of denaturation at 95°C for 15 seconds and annealing/extension at 60°C for 1 minute. The amplification steps were followed by a melt dissociation step to check for nonspecific product formation. This step comprises an additional cycle of 95°C for 15 seconds, 60°C for 1 minute, 95°C for 30 seconds and 60°C for 15 seconds. In addition, the PCR product purity was also controlled by Agarose gel electrophoresis. Two replicates were performed for each sample. To exclude any potential environmental contaminant in PCR reactions, blanks were prepared using Microbial DNA-Free Water (Qiagen) instead of DNA.

The relative standard curve method was used to quantify the specific genera in patients with chronic gastritis and with gastric carcinoma. To create standard curves, amplicons of each designed assay were cloned into pGEM-T easy vector system (Promega, Madison, WI). Dilution series of known plasmid concentrations were used to create a standard curve for each assay by plotting the log of each known concentration in the dilution series against the determined  $C_T$  (threshold cycle) value.

From the standard curves, the reaction parameters (slope, y-intercept, correlation coefficient and efficiency) were obtained and the concentration of the target bacteria species was extrapolated.

For each assay, the PCR efficiencies (determined as  $10^{(-1/\text{slope})} - 1$ ) obtained were: Universal – 91%; *Helicobacter* sp. – 100%; *Streptococcus* sp. – 115%; *Neisseria* sp. – 92%; *Prevotella* sp. – 101%; *Achromobacter* sp. – 114%; *Citrobacter* sp. – 97%; *Clostridium* sp. – 83%; *Rhodococcus*

sp. – 102%; *Lactobacillus* sp. – 91%; and *Phyllobacterium* sp. – 100%. The abundance of each genus was determined by the log<sub>10</sub> ratio between the DNA concentration determined for the specific assay and the DNA concentration determined for the universal assay. The Student's t-test was used to compare the abundance of genus between chronic gastritis and gastric carcinoma cases.

### ***Interpolation of linear and non-linear models and correlations***

Interpolation of non-linear models was used to explain the relationship between two variables.

These models were determined using the following equation (second order polynomial):

$$y = B_0 + B_1x + B_2x^2$$

where  $x$  represents the relative abundance of *Helicobacter* spp. and  $y$  represents the Shannon index.  $B_0$ ,  $B_1$  and  $B_2$  represent the polynomial coefficients. Non-linear models were shown with the 95% confidence intervals lines. Deviation of data from non-linear models was evaluated by performing run tests, which apply a series of consecutive points that are above or below the interpolation curve and determine the probability that data diverge significantly (at a  $P$ -value  $\leq 0.05$ ).

The normality of the data was evaluated using the Kolmogorov-Smirnov test. Correlations between variables were performed using Pearson's correlation (for normally distributed data) or Spearman's rank correlation (for non-normally distributed data).

### ***Logistic regression and receiver operating characteristic (ROC) analyses***

The risk of gastric carcinoma was evaluated by multivariate logistic regression analysis, using clinical outcome as dependent variable and taxa prevalence as independent variable, adjusted for age and gender. The Hosmer-Lemeshow test was used to control goodness-of-fit of logistic regression models using 8 degrees of freedom and 10 steps. ROC curves were constructed to evaluate the ability of relative abundance of genera and of MDI to detect gastric carcinoma. The relative abundance was defined as the raw counts of genus-level taxa detected in at least one sample that were then normalized per sample by the total counts of all taxa in that sample so that the resulting relative abundances sum 100%. A mean ROC curve was reported including the 95%

confident intervals. The best discrimination was determined by using the highest area under the curve at a significance value of  $P \leq 0.05$ .

### ***Microbial dysbiosis index (MDI)***

The MDI was determined as the log transformation of the ratio between the total abundance of genera increased in gastric carcinoma and the total abundance of genera decreased in gastric carcinoma.[3] Unless otherwise stated, *Rhodococcus* spp., *Lactobacillus* spp., *Clostridium* spp., *Phyllobacterium* spp., *Achromobacter* spp. and *Citrobacter* spp. were included as increased in gastric carcinoma, and *Helicobacter* spp., *Neisseria* spp., *Prevotella* spp. and *Streptococcus* spp. were included as decreased in gastric carcinoma.

### ***Functional metagenome predictions***

To predict the functional metagenome, we captured OTU representative sequences from Greengenes database using USEARCH global alignment command. Thus, only sequences with best hit to the corresponding taxonomy were kept, i.e. all OTUs with a hit of 97% similarity to the reference database were preserved. The reconstruction of the functional metagenome content was performed using PICRUSt.[4] This pipeline is a computational method to predict the gene function composition of a metagenome using 16S rRNA sequencing data and a database of reference genomes. The abundance of each OTU was corrected to reflect the true bacterial abundance by normalizing the 16S rRNA copy number for each OTU. The accuracy of the predicted metagenomes was determined by the NSTI (nearest sequenced taxon index). NSTI quantifies the availability of nearby representative genomes for each microbiome sample and is determined as the sum of phylogenetic distances for each microbe in the OTU table to its adjacent relative with a sequenced reference genome. Low NSTI values (closer to zero) indicate better accuracy in metagenome prediction.[4] Predicted functional genes were classified into clusters of orthologous groups (COG) that contains prokaryotic proteins of complete genomes or into Kyoto encyclopedia of genes and genomes orthology (KO) and submitted to a two-group comparison (gastritis vs carcinoma) using STAMP.[5] Differences in COG and KO relative frequencies were determined by White's non-parametric  $t$  test[6] with a Benjamini-Hochberg false discovery rate correction to adjust  $P$ -values for

multiple testing. The gene functions classified by KO were further categorized into KEGG Pathways using PICRUSt. The enrichment of predicted KEGG Pathways was assessed by White's non-parametric t test with a Benjamini-Hochberg false discovery rate correction and by LEfSe analysis. The functional contribution of taxa to selected predicted functions was evaluated with `metagenome_contributions.py`, a built-in function in PICRUSt.

## SUPPLEMENTARY FIGURES

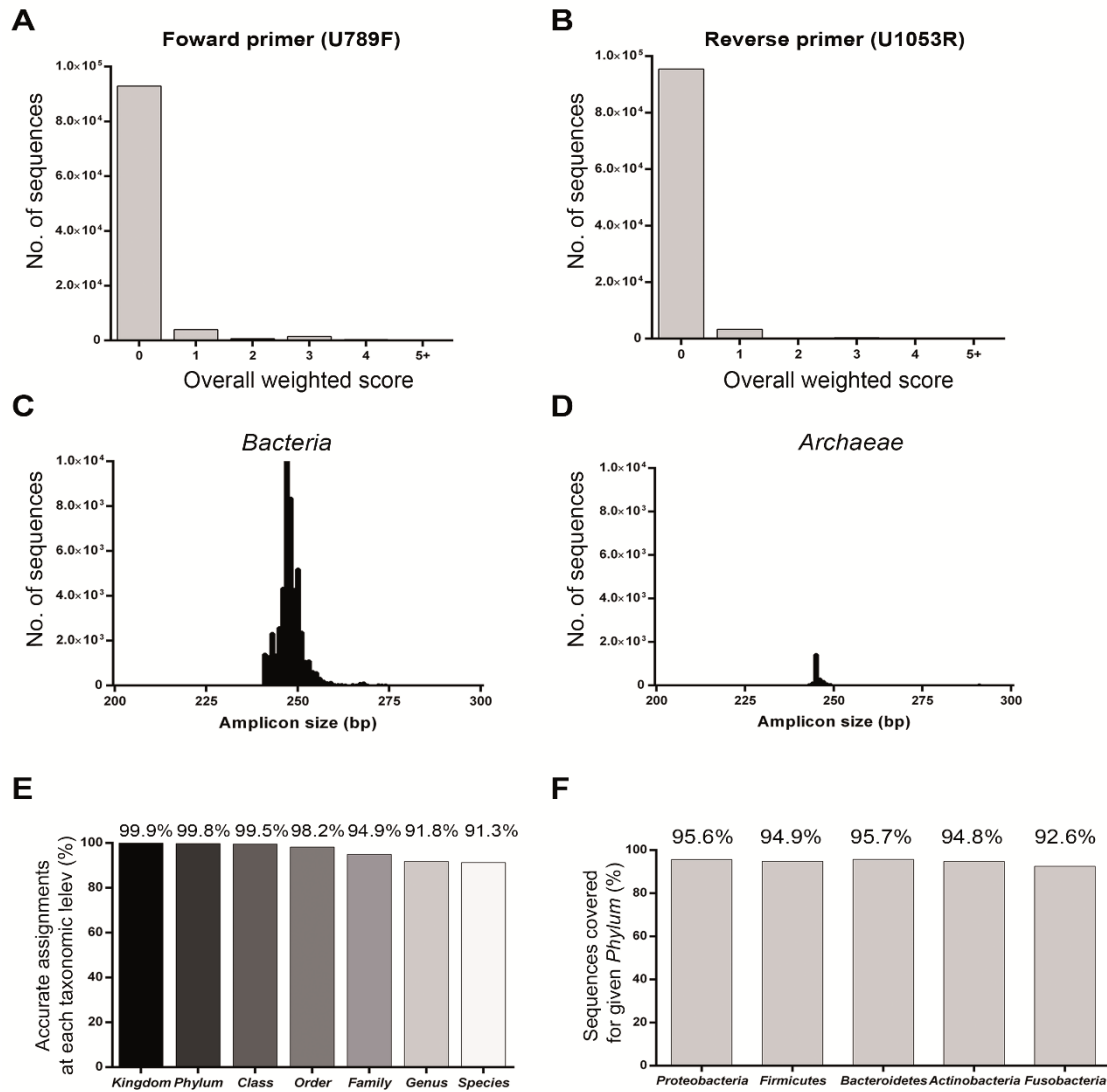

**Supplementary Figure S1.** Performance of the selected primers (U789F and U1053R) for 16S rRNA V5-V6 next-generation sequencing evaluated with Primer Analysis Pipeline implemented in PrimerProspector software package.[7] Number of sequences covered by the **(A)** forward and by the **(B)** reverse primer. The overall weighted score represents the performance of the primers by measuring penalties of primers to match reference sequences. Overall weighted score = non-3' mismatch  $\times$  0.40 + 3' mismatch  $\times$  1 + non-3' gaps  $\times$  1 + 3' gaps  $\times$  3. Simulated reads using the U789F and U1053R showed high number of **(C)** *Bacteria* sequences and low number of **(D)** *Archaea* sequences. Taxonomic coverage of simulated reads by **(E)** taxonomic level and by most relevant **(F)** *Phylum* represented in the gastric microbiota. The representative OUT sequences (clustered at 97% similarity) of the Greengenes Named Isolate database was used as reference for this analysis.



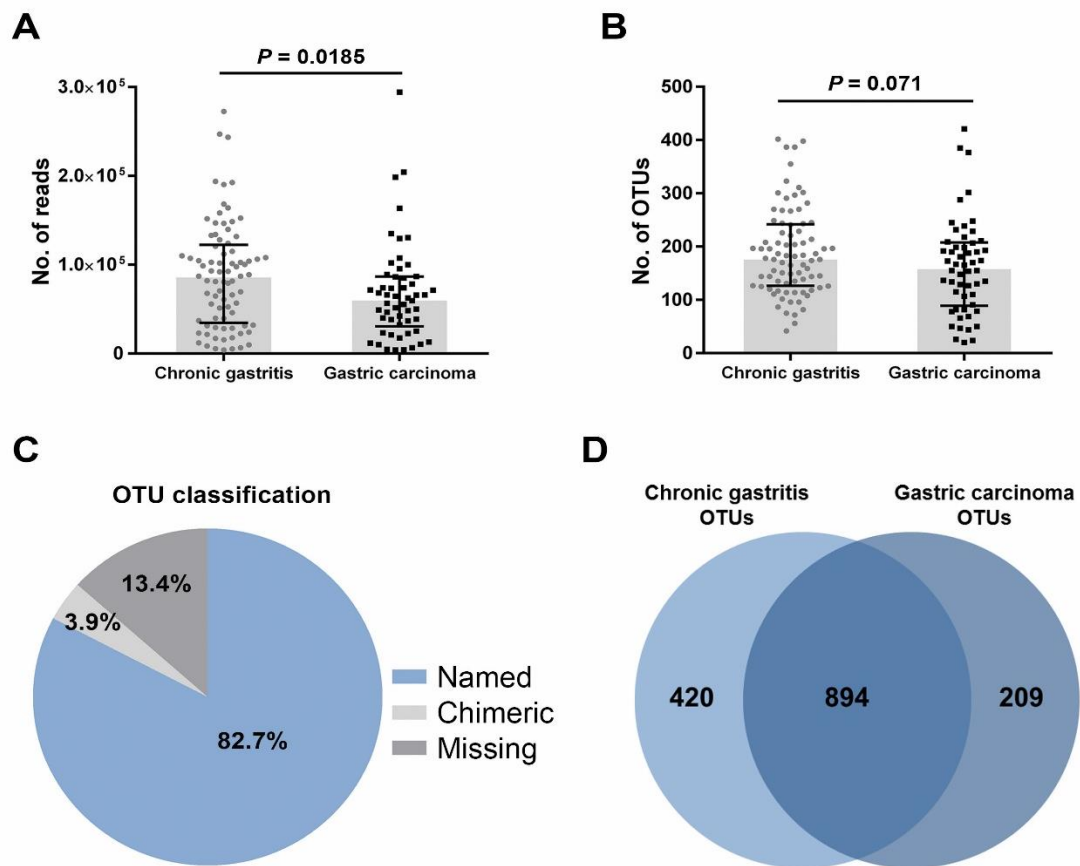

**Supplementary Figure S2.** Performance of the UPARSE pipeline<sup>6</sup> in 16S rRNA V5-V6 reads derived from 81 chronic gastritis and 54 gastric carcinoma patients. Number of reads (**A**) and OTUs (**B**) after quality filtering. Mann-Whitney test was used to compare chronic gastritis and gastric carcinoma patients in respect to the number of reads or OTUs. Data is shown as median with interquartile range. (**C**) Pie chart showing the average fraction of OTUs classified accordingly to similarity shared with sequences of the Greengenes Named Isolate database, as previously reported<sup>6, 14</sup>: Named ( $\geq 97\%$  match from the reference database), Chimeric ( $< 97\%$  match to the reference database and chimeric with high confidence) and Missing ( $< 97\%$  match with low confidence or a biological sequence missing from the database). (**D**) Venn diagram showing the number of OTUs exclusively identified in each group of patients and OTUs shared by the two groups of patients.

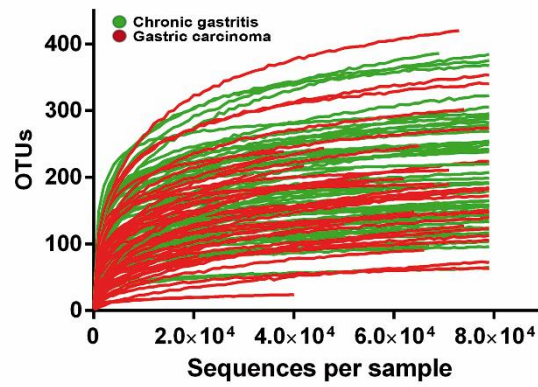

**Supplementary Figure S3.** Rarefaction curves of the number of OTUs versus the sequencing effort per sample. Rarefaction curves were estimated by bootstrapping of 20 random samples at 100 sequence increments to a maximum of 80,000 reads.

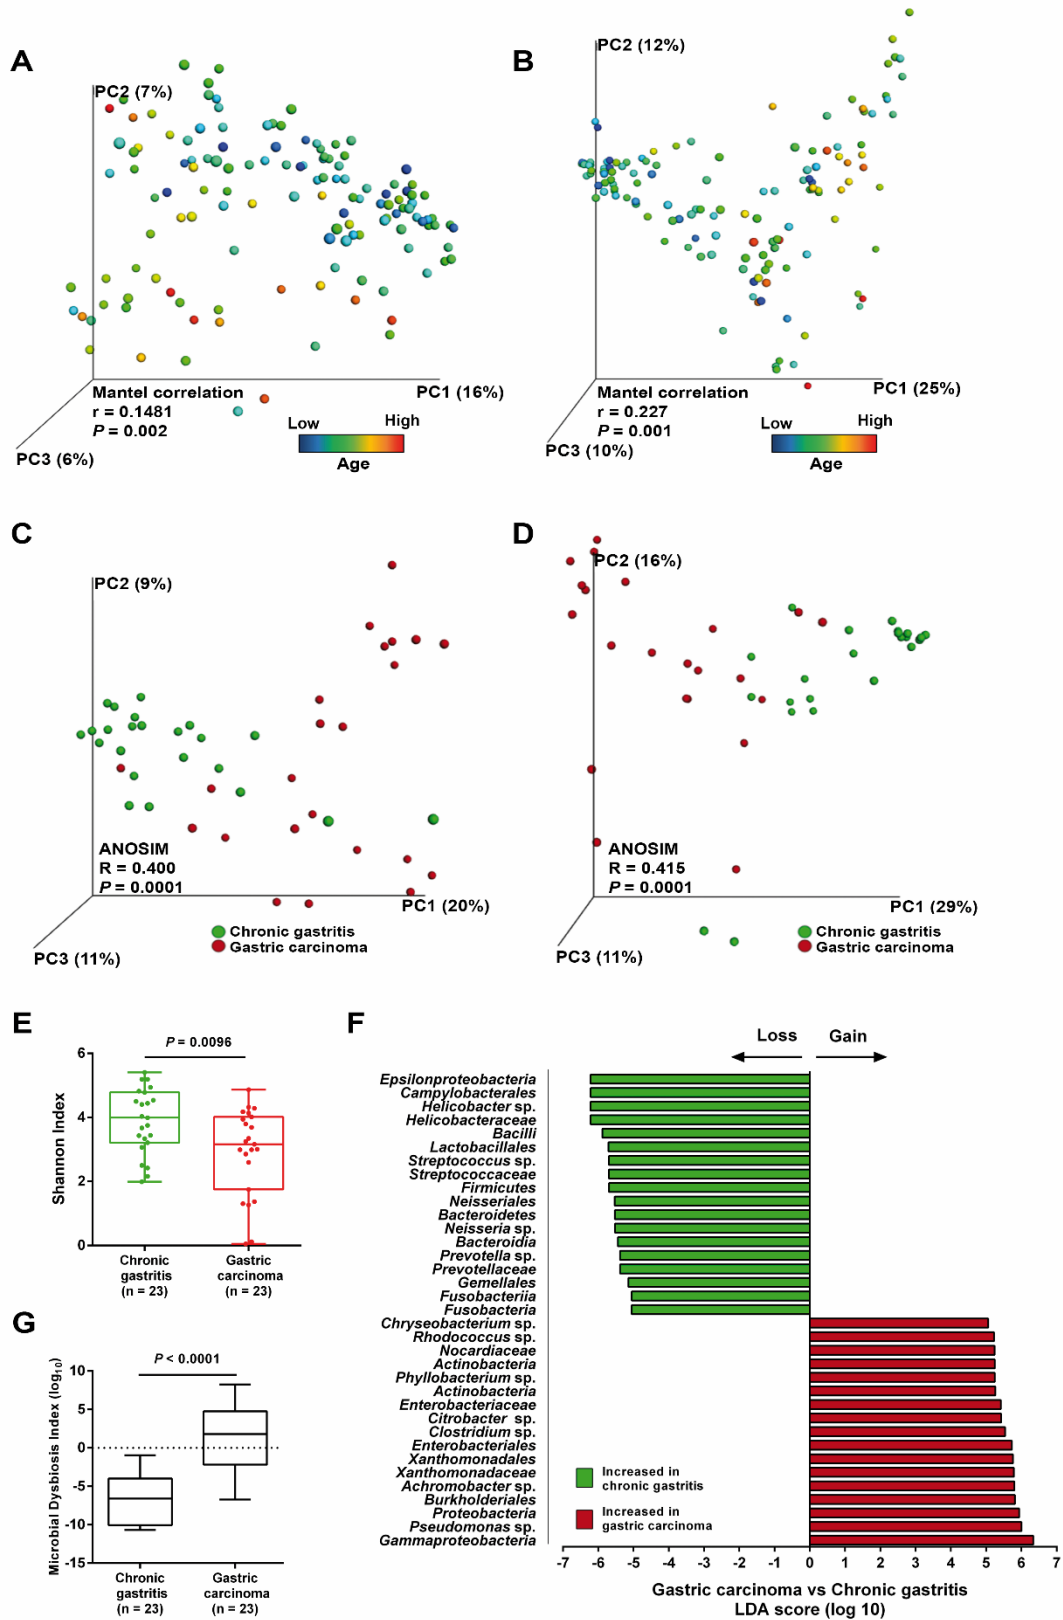

**Supplementary Figure S4.** PCoA plots of the unweighted (A) and weighted (B) UniFrac distances in the full sample set (discovery cohort) in which samples were coloured by increasing age. Mantel correlations controlled with  $10^4$  permutations were used to compare distances. PCoA plots of the unweighted (C) and weighted (D) UniFrac distances in age-matched chronic gastritis (n = 23) and

gastric carcinoma (n = 23) cases. Samples were coloured by diagnosis. Groups of patients were compared with t tests using  $10^3$  Monte Carlo permutations. **(E)** Shannon index of diversity among the age-matched chronic gastritis and gastric carcinoma cases. **(F)** LEfSe analysis showing the association of specific microbiota taxa with the clinical diagnosis. **(G)** Box plot showing the MDI in the age-matched chronic gastritis and gastric carcinoma cases.

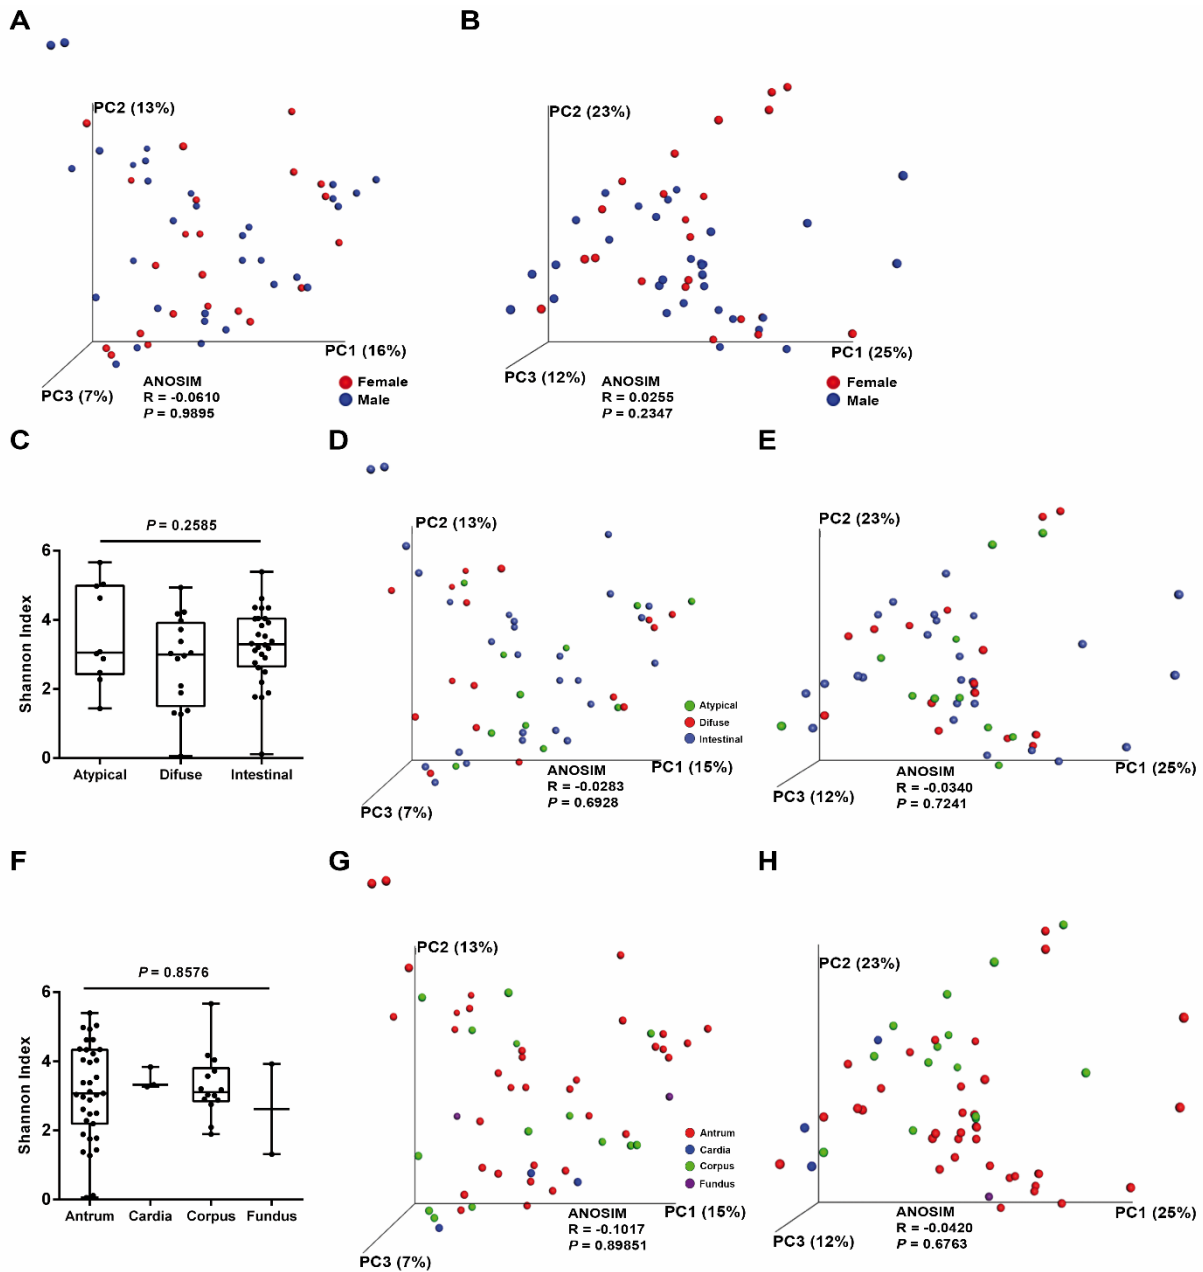

**Supplementary Figure S5. (A-B)** PCoA plots of the unweighted **(A)** and weighted UniFrac **(B)** distances in gastric carcinoma cases in the discovery cohort. Samples were coloured by gender. **(C)** Box plot showing the Shannon index across histological type of gastric carcinoma. **(D-E)** PCoA plots of the unweighted **(D)** and weighted **(E)** UniFrac distances in gastric carcinoma. Samples were coloured by histological type. **(F)** Box plot showing the Shannon index according to tumour location. **(G-H)** PCoA plots of the unweighted **(G)** and weighted **(H)** UniFrac distances in gastric carcinoma. Samples were coloured by tumour location.

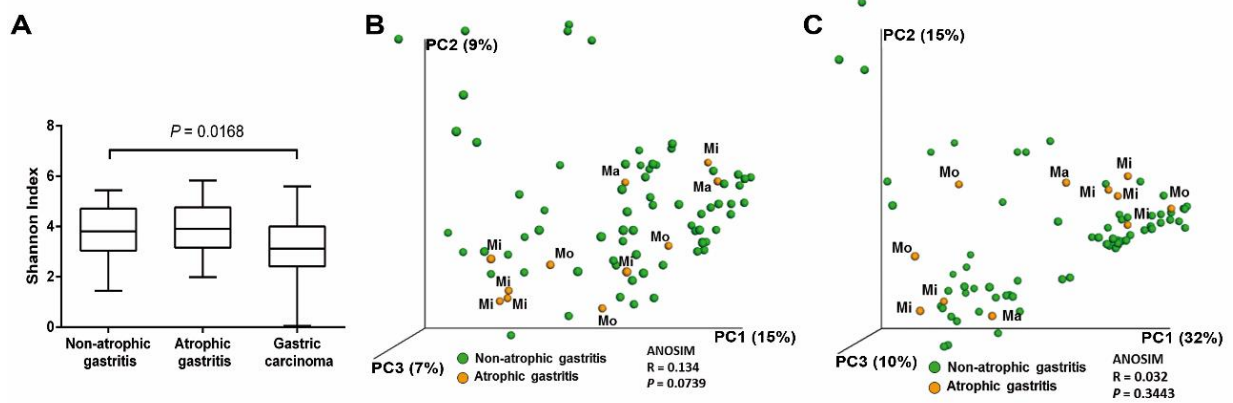

**Supplementary Figure S6. (A)** Boxplot showing the Shannon index of diversity in 70 non-atrophic gastritis patients, 11 patients with glandular atrophy and 54 gastric carcinoma patients. PCoA plots of the **(B)** unweighted and **(C)** weighted UniFrac distances in the group of chronic gastritis. Samples were colored by the presence of glandular atrophy. Mi, Mo, and Ma, stand for mild ( $n = 6$ ), moderate ( $n = 3$ ), and marked ( $n = 2$ ) glandular atrophy, respectively. Gastric carcinoma samples were omitted in these plots. PC1, PC2 and PC3 represent the top three principal coordinates that captured the maximum diversity. The percentage of diversity captured by each coordinate is shown.

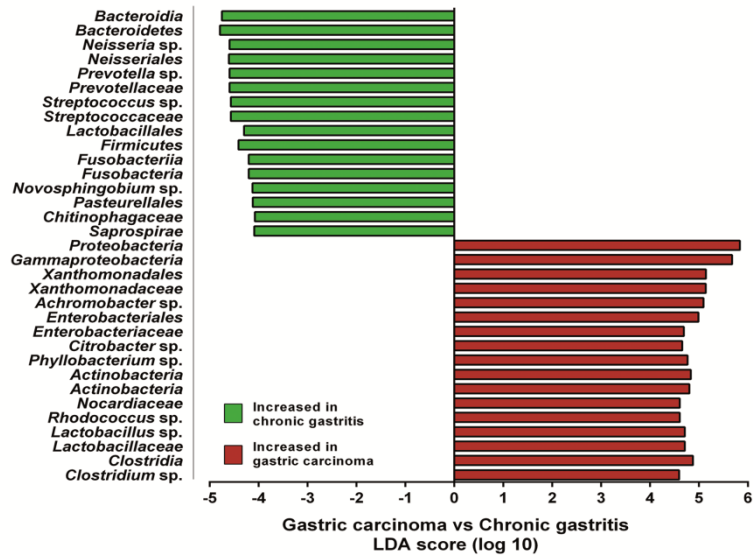

**Supplementary Figure S7.** LEfSe re-analysis, in which *Helicobacter* spp. reads were subtracted from the dataset. Green indicates taxa enriched in chronic gastritis group and red indicates taxa enriched in gastric carcinoma group.

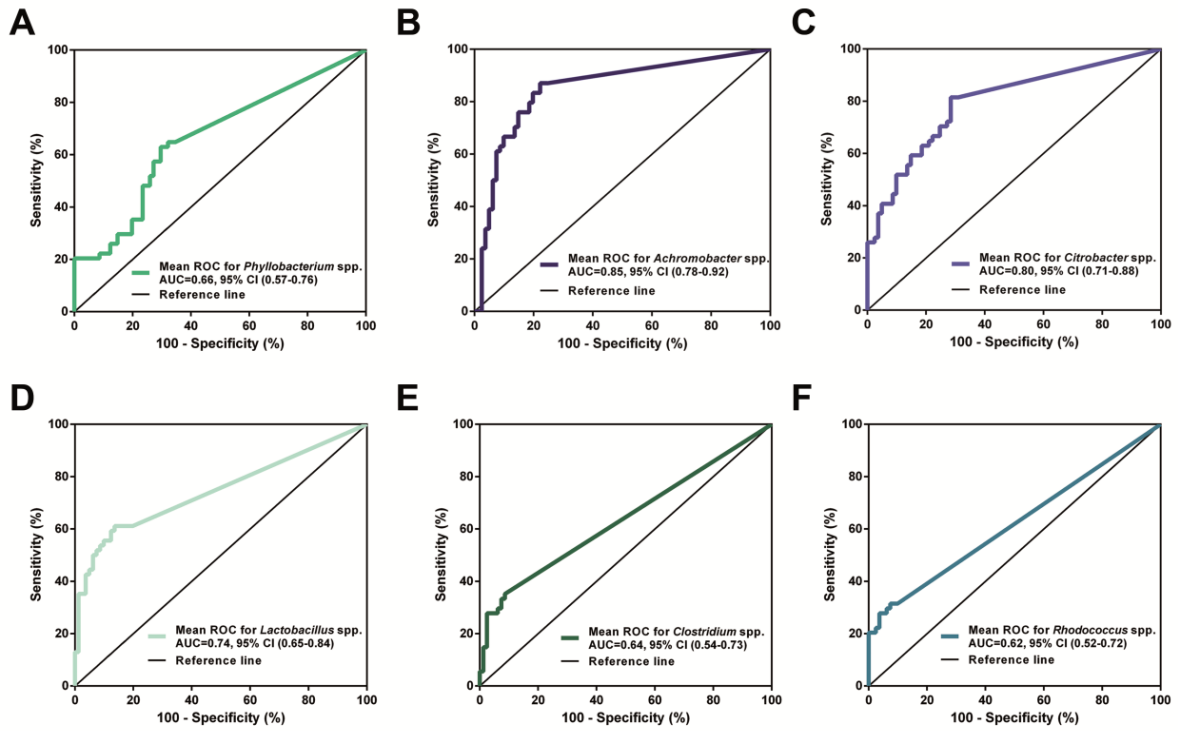

**Supplementary Figure S8.** Receiver operating characteristic (ROC) curves analysis to evaluate the discriminatory potential of abundance of **(A)** *Phyllobacterium* spp., **(B)** *Achromobacter* spp., **(C)** *Citrobacter* spp., **(D)** *Lactobacillus* spp., **(E)** *Clostridium* spp. and **(F)** *Rhodococcus* spp. The discriminatory potential of a biomarker was determined by the highest area under the curve.



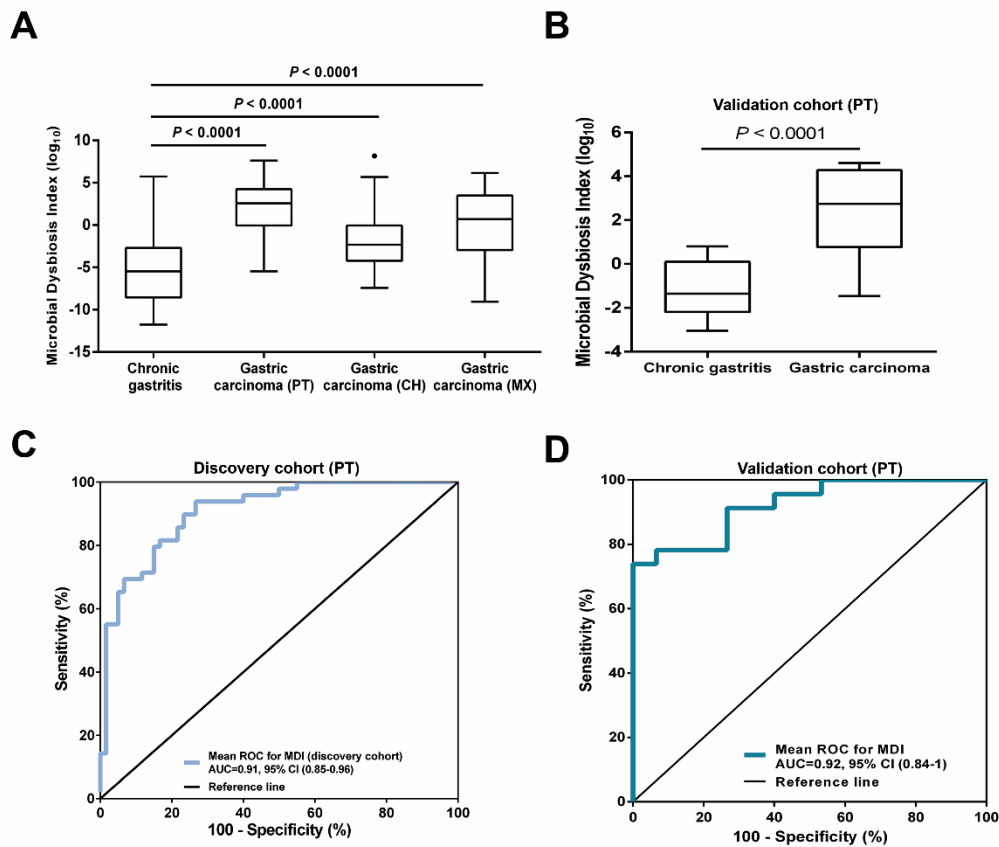

**Supplementary Figure S9.** Microbial dysbiosis index calculated excluding *Prevotella* sp. and *Streptococcus* sp. **(A)** Box plot showing the MDI in the discovery cohort and in the Chinese and Mexican validation cohorts. **(B)** Box plot showing the MDI the Portuguese validation cohort. Significance was obtained by Student's t-test. **(C-D)** ROC curve analysis to evaluate the discriminatory potential of MDI in gastric carcinoma detection in the discovery cohort **(C)** and in the Portuguese validation cohort **(D)**.

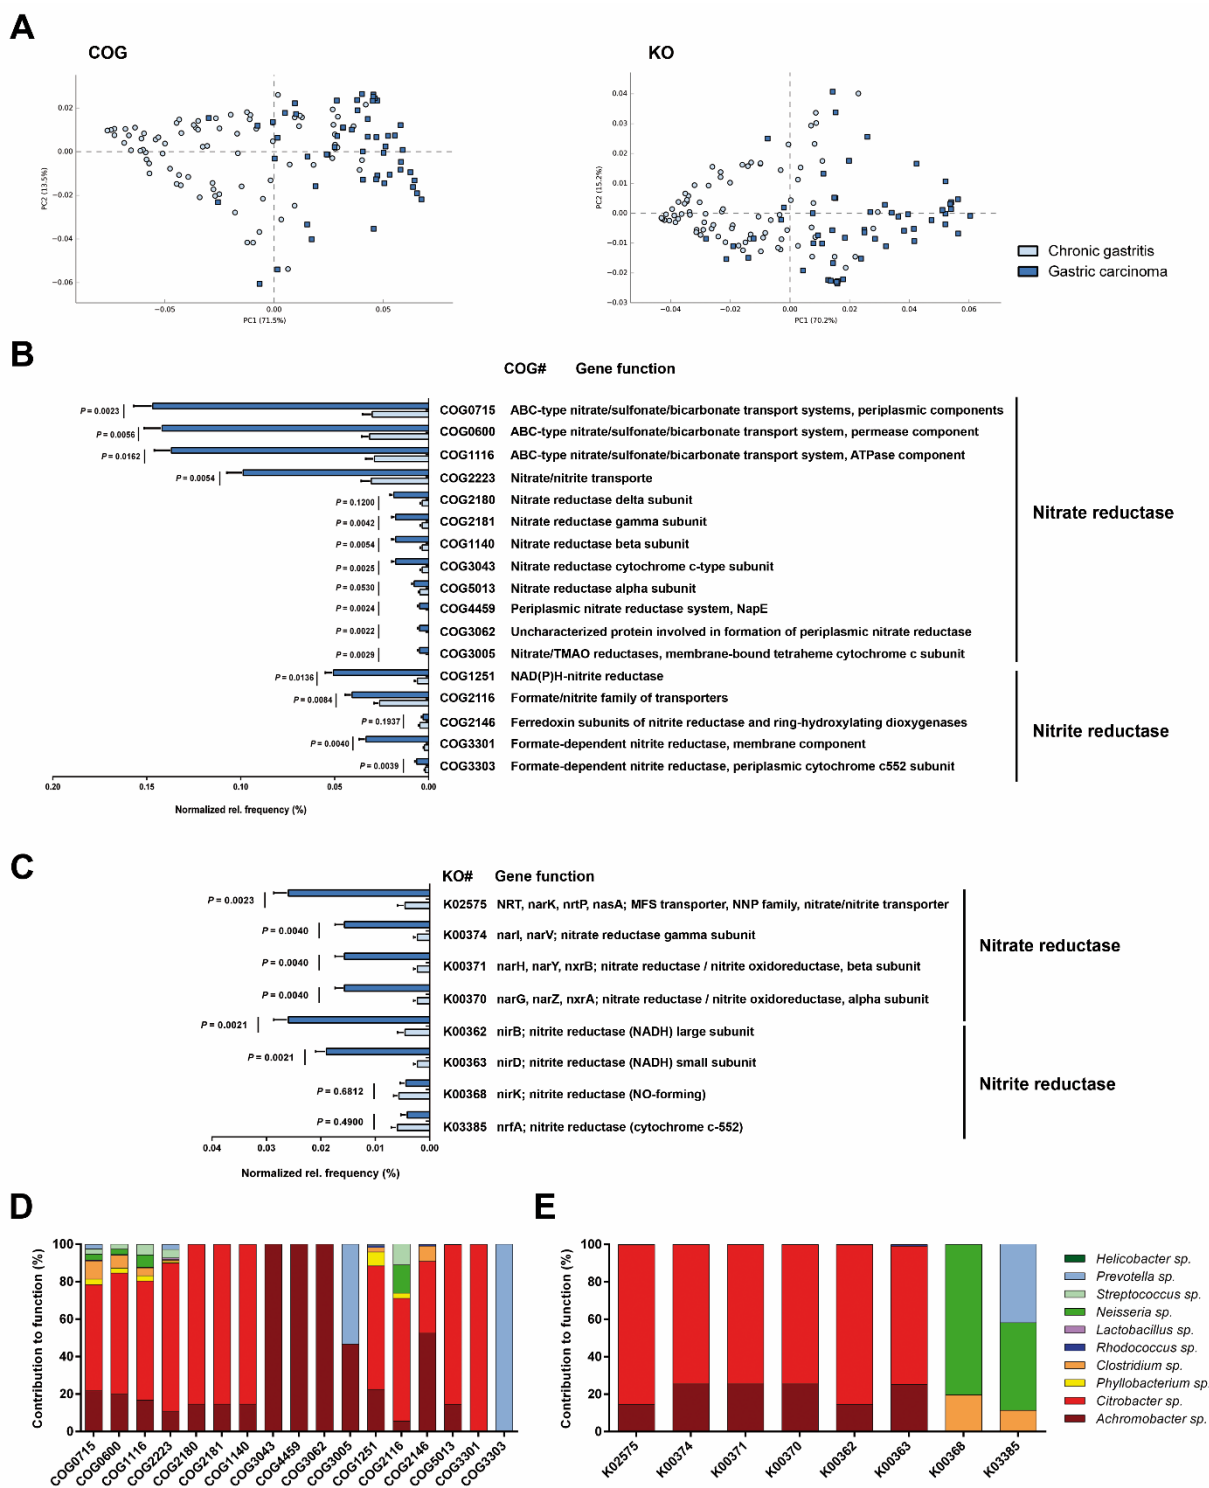

**Supplementary Figure S10. (A)** Principal component analysis (PCA) plot comparing the metagenome predictions (for COG and KO using PICRUSt) of the microbiota of patients with chronic gastritis and gastric carcinoma. **(B-C)** Normalized relative frequency of nitrate reductase **(B)** and nitrite reductase **(C)** functions predicted with the 10 genera differentially abundant in the two patient groups. Significance was considered for adjusted  $P < 0.05$ . **(D-E)** Genera contribution to each nitrate and nitrate reductase functions (Supplementary Table S5).

## SUPPLEMENTARY TABLES

**Supplementary Table S1.** Characteristics of the patients in the Portuguese discovery and validation cohorts.

| Patient characteristics                               | Discovery cohort           |                            |            | Validation cohort          |                            |            |
|-------------------------------------------------------|----------------------------|----------------------------|------------|----------------------------|----------------------------|------------|
|                                                       | Chronic gastritis (n = 81) | Gastric carcinoma (n = 54) | <i>P</i> * | Chronic gastritis (n = 15) | Gastric carcinoma (n = 23) | <i>P</i> * |
| Age (mean ± S.D.)                                     | 43.6 ± 7.0                 | 58.8 ± 13.2                | < 0.001    | 58.1 ± 16                  | 68.9 ± 13.5                | 0.032      |
| Gender (n, %)                                         |                            |                            |            |                            |                            |            |
| Male                                                  | 79 (97.5)                  | 32 (59.3)                  | < 0.001    | 5 (33.3)                   | 16 (69.6)                  | 0.028      |
| Female                                                | 2 (2.5)                    | 22 (40.7)                  |            | 10 (66.7)                  | 7 (30.4)                   |            |
| <i>H. pylori</i> status determined by PCR-LiPA (n, %) |                            |                            |            |                            |                            |            |
| Positive                                              | 80 (98.8)                  | 47 (87.0)                  | 0.007      | -                          | -                          |            |
| Negative                                              | 1 (1.2)                    | 7 (13.0)                   |            | -                          | -                          |            |
| Histological type of gastric cancer (n, %)            |                            |                            |            |                            |                            |            |
| Intestinal                                            | NA                         | 27 (50.0)                  |            | NA                         | 11 (47.8)                  |            |
| Diffuse                                               | NA                         | 16 (29.6)                  |            | NA                         | 0 (0)                      |            |
| Indeterminate/mixed                                   | NA                         | 11 (20.4)                  |            | NA                         | 12 (52.2)                  |            |
| Tumor stage (n, %)                                    |                            |                            |            |                            |                            |            |
| T1                                                    | NA                         | 4 (7.4)                    |            | NA                         | 1 (4.3)                    |            |
| T2                                                    | NA                         | 3 (5.6)                    |            | NA                         | 4 (17.4)                   |            |
| T3                                                    | NA                         | 47 (87.0)                  |            | NA                         | 12 (52.2)                  |            |
| T4                                                    | NA                         | 0 (0)                      |            | NA                         | 6 (26.1)                   |            |
| Lymph node metastasis (n, %)                          |                            |                            |            |                            |                            |            |
| Presence                                              | NA                         | 44 (81.5)                  |            | NA                         | 16 (69.6)                  |            |
| Absent                                                | NA                         | 10 (18.5)                  |            | NA                         | 7 (30.4)                   |            |
| Vascular invasion (n, %)                              |                            |                            |            |                            |                            |            |
| Presence                                              | NA                         | 28 (51.9)                  |            | NA                         | 16 (69.6)                  |            |
| Absent                                                | NA                         | 26 (48.1)                  |            | NA                         | 7 (30.4)                   |            |
| Distant metastasis (n, %)                             |                            |                            |            |                            |                            |            |
| Presence                                              | NA                         | 1 (1.9)                    |            | NA                         | 0 (0)                      |            |
| Absent                                                | NA                         | 53 (98.1)                  |            | NA                         | 23 (100)                   |            |

NA, not applicable. \**P*-value obtained by Fisher's exact test for categorical variables and by *t* test for continuous variables. Statistical tests were performed two-sided.

**Supplementary Table S2.** Characteristics of the patients and retrieval data in the Chinese and in the Mexican validation cohorts.

| SampleID  | Clinical_setting  | Gender | Age | Local | SRA_Sample | SRA_Study | SRA_Project |
|-----------|-------------------|--------|-----|-------|------------|-----------|-------------|
| Chi_GC_1  | Gastric_carcinoma | Female | 66  | China | SRR3991143 | SRP080738 | PRJNA310127 |
| Chi_GC_2  | Gastric_carcinoma | Male   | 62  | China | SRR3991145 | SRP080738 | PRJNA310127 |
| Chi_GC_3  | Gastric_carcinoma | Male   | 53  | China | SRR3991147 | SRP080738 | PRJNA310127 |
| Chi_GC_4  | Gastric_carcinoma | Male   | 62  | China | SRR3991149 | SRP080738 | PRJNA310127 |
| Chi_GC_5  | Gastric_carcinoma | Male   | 32  | China | SRR3991151 | SRP080738 | PRJNA310127 |
| Chi_GC_6  | Gastric_carcinoma | Male   | 62  | China | SRR3991153 | SRP080738 | PRJNA310127 |
| Chi_GC_7  | Gastric_carcinoma | Male   | 62  | China | SRR3991155 | SRP080738 | PRJNA310127 |
| Chi_GC_8  | Gastric_carcinoma | Male   | 66  | China | SRR3991157 | SRP080738 | PRJNA310127 |
| Chi_GC_9  | Gastric_carcinoma | Male   | 56  | China | SRR3991159 | SRP080738 | PRJNA310127 |
| Chi_GC_10 | Gastric_carcinoma | Male   | 68  | China | SRR3991161 | SRP080738 | PRJNA310127 |
| Chi_GC_11 | Gastric_carcinoma | Male   | 70  | China | SRR3991163 | SRP080738 | PRJNA310127 |
| Chi_GC_12 | Gastric_carcinoma | Male   | 61  | China | SRR3991165 | SRP080738 | PRJNA310127 |
| Chi_GC_13 | Gastric_carcinoma | Male   | 58  | China | SRR3991167 | SRP080738 | PRJNA310127 |
| Chi_GC_14 | Gastric_carcinoma | Male   | 69  | China | SRR3991169 | SRP080738 | PRJNA310127 |
| Chi_GC_15 | Gastric_carcinoma | Male   | 65  | China | SRR3991171 | SRP080738 | PRJNA310127 |
| Chi_GC_16 | Gastric_carcinoma | Male   | 67  | China | SRR3991173 | SRP080738 | PRJNA310127 |
| Chi_GC_17 | Gastric_carcinoma | Male   | 64  | China | SRR3991175 | SRP080738 | PRJNA310127 |
| Chi_GC_18 | Gastric_carcinoma | Male   | 69  | China | SRR3991177 | SRP080738 | PRJNA310127 |
| Chi_GC_19 | Gastric_carcinoma | Male   | 61  | China | SRR3991179 | SRP080738 | PRJNA310127 |
| Chi_GC_20 | Gastric_carcinoma | Male   | 68  | China | SRR3991181 | SRP080738 | PRJNA310127 |
| Chi_GC_21 | Gastric_carcinoma | Male   | 58  | China | SRR3991183 | SRP080738 | PRJNA310127 |
| Chi_GC_22 | Gastric_carcinoma | Female | 54  | China | SRR3991185 | SRP080738 | PRJNA310127 |
| Chi_GC_23 | Gastric_carcinoma | Male   | 60  | China | SRR3991187 | SRP080738 | PRJNA310127 |
| Chi_GC_24 | Gastric_carcinoma | Male   | 60  | China | SRR3991189 | SRP080738 | PRJNA310127 |
| Chi_GC_25 | Gastric_carcinoma | Male   | 59  | China | SRR3991191 | SRP080738 | PRJNA310127 |
| Chi_GC_26 | Gastric_carcinoma | Female | 70  | China | SRR3991193 | SRP080738 | PRJNA310127 |
| Chi_GC_27 | Gastric_carcinoma | Male   | 69  | China | SRR3991195 | SRP080738 | PRJNA310127 |
| Chi_GC_28 | Gastric_carcinoma | Male   | 51  | China | SRR3991197 | SRP080738 | PRJNA310127 |
| Chi_GC_29 | Gastric_carcinoma | Male   | 61  | China | SRR3991199 | SRP080738 | PRJNA310127 |
| Chi_GC_30 | Gastric_carcinoma | Male   | 64  | China | SRR3991201 | SRP080738 | PRJNA310127 |
| Chi_GC_31 | Gastric_carcinoma | Male   | 54  | China | SRR3991203 | SRP080738 | PRJNA310127 |
| Chi_GC_32 | Gastric_carcinoma | Male   | 70  | China | SRR3991205 | SRP080738 | PRJNA310127 |
| Chi_GC_33 | Gastric_carcinoma | Male   | 67  | China | SRR3991207 | SRP080738 | PRJNA310127 |
| Chi_GC_34 | Gastric_carcinoma | Male   | 63  | China | SRR3991209 | SRP080738 | PRJNA310127 |
| Chi_GC_35 | Gastric_carcinoma | Male   | 66  | China | SRR3991211 | SRP080738 | PRJNA310127 |
| Chi_GC_36 | Gastric_carcinoma | Female | 68  | China | SRR3991213 | SRP080738 | PRJNA310127 |
| Chi_GC_37 | Gastric_carcinoma | Female | 50  | China | SRR3991215 | SRP080738 | PRJNA310127 |
| Chi_GC_38 | Gastric_carcinoma | Male   | 64  | China | SRR3991217 | SRP080738 | PRJNA310127 |
| Chi_GC_39 | Gastric_carcinoma | Male   | 63  | China | SRR3991219 | SRP080738 | PRJNA310127 |
| Chi_GC_40 | Gastric_carcinoma | Male   | 59  | China | SRR3991221 | SRP080738 | PRJNA310127 |
| Chi_GC_41 | Gastric_carcinoma | Female | 60  | China | SRR3991223 | SRP080738 | PRJNA310127 |
| Chi_GC_42 | Gastric_carcinoma | Female | 59  | China | SRR3991225 | SRP080738 | PRJNA310127 |

|           |                   |        |    |        |            |           |             |
|-----------|-------------------|--------|----|--------|------------|-----------|-------------|
| Chi_GC_43 | Gastric_carcinoma | Male   | 32 | China  | SRR3991227 | SRP080738 | PRJNA310127 |
| Chi_GC_44 | Gastric_carcinoma | Male   | 70 | China  | SRR3991229 | SRP080738 | PRJNA310127 |
| Chi_GC_45 | Gastric_carcinoma | Male   | 62 | China  | SRR3991231 | SRP080738 | PRJNA310127 |
| Chi_GC_46 | Gastric_carcinoma | Male   | 48 | China  | SRR3991232 | SRP080738 | PRJNA310127 |
| Chi_GC_47 | Gastric_carcinoma | Male   | 63 | China  | SRR3991234 | SRP080738 | PRJNA310127 |
| Chi_GC_48 | Gastric_carcinoma | Male   | 51 | China  | SRR3991236 | SRP080738 | PRJNA310127 |
| Chi_GC_49 | Gastric_carcinoma | Male   | 65 | China  | SRR3991237 | SRP080738 | PRJNA310127 |
| Chi_GC_50 | Gastric_carcinoma | Male   | 68 | China  | SRR3991239 | SRP080738 | PRJNA310127 |
| Chi_GC_51 | Gastric_carcinoma | Male   | 48 | China  | SRR3991241 | SRP080738 | PRJNA310127 |
| Chi_GC_52 | Gastric_carcinoma | Male   | 58 | China  | SRR3991243 | SRP080738 | PRJNA310127 |
| Chi_GC_53 | Gastric_carcinoma | Male   | 56 | China  | SRR3991245 | SRP080738 | PRJNA310127 |
| Chi_GC_54 | Gastric_carcinoma | Female | 64 | China  | SRR3991247 | SRP080738 | PRJNA310127 |
| Chi_GC_55 | Gastric_carcinoma | Male   | 60 | China  | SRR3991249 | SRP080738 | PRJNA310127 |
| Chi_GC_56 | Gastric_carcinoma | Male   | 60 | China  | SRR3991251 | SRP080738 | PRJNA310127 |
| Chi_GC_57 | Gastric_carcinoma | Male   | 67 | China  | SRR3991253 | SRP080738 | PRJNA310127 |
| Chi_GC_58 | Gastric_carcinoma | Male   | 70 | China  | SRR3991255 | SRP080738 | PRJNA310127 |
| Chi_GC_59 | Gastric_carcinoma | Male   | 47 | China  | SRR3991257 | SRP080738 | PRJNA310127 |
| Chi_GC_60 | Gastric_carcinoma | Male   | 69 | China  | SRR3991259 | SRP080738 | PRJNA310127 |
| Chi_GC_61 | Gastric_carcinoma | Male   | 50 | China  | SRR3991261 | SRP080738 | PRJNA310127 |
| Chi_GC_62 | Gastric_carcinoma | Male   | 68 | China  | SRR3991263 | SRP080738 | PRJNA310127 |
| Chi_GC_63 | Gastric_carcinoma | Male   | 65 | China  | SRR3991265 | SRP080738 | PRJNA310127 |
| Chi_GC_64 | Gastric_carcinoma | Male   | 45 | China  | SRR3991267 | SRP080738 | PRJNA310127 |
| Chi_GC_65 | Gastric_carcinoma | Male   | 65 | China  | SRR3991269 | SRP080738 | PRJNA310127 |
| Chi_GC_66 | Gastric_carcinoma | Female | 59 | China  | SRR3991271 | SRP080738 | PRJNA310127 |
| Chi_GC_67 | Gastric_carcinoma | Female | 69 | China  | SRR3991273 | SRP080738 | PRJNA310127 |
| Chi_GC_68 | Gastric_carcinoma | Female | 50 | China  | SRR3991274 | SRP080738 | PRJNA310127 |
| Chi_GC_69 | Gastric_carcinoma | Female | 50 | China  | SRR3991276 | SRP080738 | PRJNA310127 |
| Chi_GC_70 | Gastric_carcinoma | Female | 67 | China  | SRR3991278 | SRP080738 | PRJNA310127 |
| Chi_GC_71 | Gastric_carcinoma | Male   | 64 | China  | SRR3991280 | SRP080738 | PRJNA310127 |
| Chi_GC_72 | Gastric_carcinoma | Male   | 66 | China  | SRR3991282 | SRP080738 | PRJNA310127 |
| Chi_GC_73 | Gastric_carcinoma | Male   | 49 | China  | SRR3991284 | SRP080738 | PRJNA310127 |
| Chi_GC_74 | Gastric_carcinoma | Male   | 59 | China  | SRR3991286 | SRP080738 | PRJNA310127 |
| Chi_GC_75 | Gastric_carcinoma | Female | 65 | China  | SRR3991288 | SRP080738 | PRJNA310127 |
| Chi_GC_76 | Gastric_carcinoma | Male   | 50 | China  | SRR3991290 | SRP080738 | PRJNA310127 |
| Chi_GC_77 | Gastric_carcinoma | Male   | 62 | China  | SRR3991292 | SRP080738 | PRJNA310127 |
| Chi_GC_78 | Gastric_carcinoma | Male   | 59 | China  | SRR3991294 | SRP080738 | PRJNA310127 |
| Chi_GC_79 | Gastric_carcinoma | Male   | 67 | China  | SRR3991296 | SRP080738 | PRJNA310127 |
| Mex_GC_1  | Gastric_carcinoma | Female | 82 | Mexico | SRR3991007 | SRP080738 | PRJNA310127 |
| Mex_GC_2  | Gastric_carcinoma | Male   | 72 | Mexico | SRR3991010 | SRP080738 | PRJNA310127 |
| Mex_GC_4  | Gastric_carcinoma | Female | 58 | Mexico | SRR3991014 | SRP080738 | PRJNA310127 |
| Mex_GC_5  | Gastric_carcinoma | Female | 38 | Mexico | SRR3991016 | SRP080738 | PRJNA310127 |
| Mex_GC_6  | Gastric_carcinoma | Female | 44 | Mexico | SRR3991018 | SRP080738 | PRJNA310127 |
| Mex_GC_7  | Gastric_carcinoma | Female | 70 | Mexico | SRR3991020 | SRP080738 | PRJNA310127 |
| Mex_GC_8  | Gastric_carcinoma | Male   | 75 | Mexico | SRR3991023 | SRP080738 | PRJNA310127 |
| Mex_GC_9  | Gastric_carcinoma | Female | 66 | Mexico | SRR3991025 | SRP080738 | PRJNA310127 |
| Mex_GC_10 | Gastric_carcinoma | Male   | 70 | Mexico | SRR3991027 | SRP080738 | PRJNA310127 |
| Mex_GC_11 | Gastric_carcinoma | Female | 56 | Mexico | SRR3991028 | SRP080738 | PRJNA310127 |
| Mex_GC_12 | Gastric_carcinoma | Male   | 75 | Mexico | SRR3991031 | SRP080738 | PRJNA310127 |
| Mex_GC_13 | Gastric_carcinoma | Female | 56 | Mexico | SRR3991033 | SRP080738 | PRJNA310127 |

|           |                   |        |    |        |            |           |             |
|-----------|-------------------|--------|----|--------|------------|-----------|-------------|
| Mex_GC_14 | Gastric_carcinoma | Female | 54 | Mexico | SRR3991035 | SRP080738 | PRJNA310127 |
| Mex_GC_15 | Gastric_carcinoma | Male   | 69 | Mexico | SRR3991038 | SRP080738 | PRJNA310127 |
| Mex_GC_16 | Gastric_carcinoma | Female | 75 | Mexico | SRR3991040 | SRP080738 | PRJNA310127 |
| Mex_GC_17 | Gastric_carcinoma | Female | 42 | Mexico | SRR3991042 | SRP080738 | PRJNA310127 |
| Mex_GC_18 | Gastric_carcinoma | Male   | 64 | Mexico | SRR3991044 | SRP080738 | PRJNA310127 |
| Mex_GC_19 | Gastric_carcinoma | Female | 52 | Mexico | SRR3991046 | SRP080738 | PRJNA310127 |
| Mex_GC_20 | Gastric_carcinoma | Male   | 58 | Mexico | SRR3991048 | SRP080738 | PRJNA310127 |
| Mex_GC_21 | Gastric_carcinoma | Female | 82 | Mexico | SRR3991051 | SRP080738 | PRJNA310127 |
| Mex_GC_22 | Gastric_carcinoma | Female | 72 | Mexico | SRR3991053 | SRP080738 | PRJNA310127 |
| Mex_GC_23 | Gastric_carcinoma | Male   | 57 | Mexico | SRR3991056 | SRP080738 | PRJNA310127 |
| Mex_GC_24 | Gastric_carcinoma | Female | 81 | Mexico | SRR3991058 | SRP080738 | PRJNA310127 |
| Mex_GC_25 | Gastric_carcinoma | Male   | 62 | Mexico | SRR3991061 | SRP080738 | PRJNA310127 |
| Mex_GC_26 | Gastric_carcinoma | Female | 79 | Mexico | SRR3991063 | SRP080738 | PRJNA310127 |
| Mex_GC_27 | Gastric_carcinoma | Male   | 38 | Mexico | SRR3991066 | SRP080738 | PRJNA310127 |
| Mex_GC_28 | Gastric_carcinoma | Female | 56 | Mexico | SRR3991069 | SRP080738 | PRJNA310127 |
| Mex_GC_29 | Gastric_carcinoma | Female | 72 | Mexico | SRR3991072 | SRP080738 | PRJNA310127 |
| Mex_GC_30 | Gastric_carcinoma | Male   | 45 | Mexico | SRR3991079 | SRP080738 | PRJNA310127 |
| Mex_GC_31 | Gastric_carcinoma | Male   | 69 | Mexico | SRR3991082 | SRP080738 | PRJNA310127 |
| Mex_GC_32 | Gastric_carcinoma | Female | 48 | Mexico | SRR3991084 | SRP080738 | PRJNA310127 |
| Mex_GC_33 | Gastric_carcinoma | Male   | 60 | Mexico | SRR3991088 | SRP080738 | PRJNA310127 |
| Mex_GC_34 | Gastric_carcinoma | Male   | 46 | Mexico | SRR3991090 | SRP080738 | PRJNA310127 |
| Mex_GC_35 | Gastric_carcinoma | Male   | 56 | Mexico | SRR3991092 | SRP080738 | PRJNA310127 |
| Mex_GC_36 | Gastric_carcinoma | Male   | 48 | Mexico | SRR3991094 | SRP080738 | PRJNA310127 |
| Mex_GC_37 | Gastric_carcinoma | Male   | 80 | Mexico | SRR3991096 | SRP080738 | PRJNA310127 |
| Mex_GC_38 | Gastric_carcinoma | Male   | 91 | Mexico | SRR3991098 | SRP080738 | PRJNA310127 |
| Mex_GC_39 | Gastric_carcinoma | Female | 56 | Mexico | SRR3991100 | SRP080738 | PRJNA310127 |
| Mex_GC_40 | Gastric_carcinoma | Female | 67 | Mexico | SRR3991102 | SRP080738 | PRJNA310127 |
| Mex_GC_41 | Gastric_carcinoma | Male   | 61 | Mexico | SRR3991104 | SRP080738 | PRJNA310127 |
| Mex_GC_42 | Gastric_carcinoma | Male   | 71 | Mexico | SRR3991106 | SRP080738 | PRJNA310127 |
| Mex_GC_43 | Gastric_carcinoma | Female | 77 | Mexico | SRR3991110 | SRP080738 | PRJNA310127 |
| Mex_GC_44 | Gastric_carcinoma | Female | 42 | Mexico | SRR3991112 | SRP080738 | PRJNA310127 |
| Mex_GC_45 | Gastric_carcinoma | Female | 67 | Mexico | SRR3991114 | SRP080738 | PRJNA310127 |
| Mex_GC_46 | Gastric_carcinoma | Female | 77 | Mexico | SRR3991116 | SRP080738 | PRJNA310127 |
| Mex_GC_47 | Gastric_carcinoma | Male   | 37 | Mexico | SRR3991118 | SRP080738 | PRJNA310127 |
| Mex_GC_48 | Gastric_carcinoma | Female | 73 | Mexico | SRR3991120 | SRP080738 | PRJNA310127 |
| Mex_GC_49 | Gastric_carcinoma | Female | 67 | Mexico | SRR3991123 | SRP080738 | PRJNA310127 |
| Mex_GC_50 | Gastric_carcinoma | Male   | 80 | Mexico | SRR3991127 | SRP080738 | PRJNA310127 |
| Mex_GC_51 | Gastric_carcinoma | Male   | 76 | Mexico | SRR3991129 | SRP080738 | PRJNA310127 |
| Mex_GC_52 | Gastric_carcinoma | Female | 49 | Mexico | SRR3991133 | SRP080738 | PRJNA310127 |
| Mex_GC_53 | Gastric_carcinoma | Male   | 67 | Mexico | SRR3991135 | SRP080738 | PRJNA310127 |
| Mex_GC_54 | Gastric_carcinoma | Male   | 74 | Mexico | SRR3991137 | SRP080738 | PRJNA310127 |

**Supplementary Table S3.** Primers used in qPCR and, unless otherwise stated, designed for this study.

| Primer         | Sequence (5'-3')            | Amplicon size (bp) | Target species             |
|----------------|-----------------------------|--------------------|----------------------------|
| Helicobacter_F | GAAGATAATGACGGTATCTAAC      | 139                | <i>Helicobacter</i> sp.    |
| Helicobacter_R | ATTTCACACCTGACTGACTAT       |                    |                            |
| Neisseria_F    | AACGATGTCAATTAGCTGTT        | 108                | <i>Neisseria</i> sp.       |
| Neisseria_R    | CAATTCCTTTGAGTTTTAATC       |                    |                            |
| Achromo_F1     | TCGGGCCTTGGTAGCG            | 77                 | <i>Achromobacter</i> sp.   |
| Achromo_R1     | TTCCTTTGAGTTTTAATCTT        |                    |                            |
| Phyllo_F       | CTGCCTTTGATACTGGTAGT        | 202                | <i>Phyllobacterium</i> sp. |
| Phyllo_R       | CGGCTAGCTCTCATAGTTTA        |                    |                            |
| Clostr_F*      | ATGCAAGTCGAGCGAKG           | 120                | <i>Clostridium</i> sp.     |
| Clostr_R*      | TATGCGGTATTAATCTKCCTTT      |                    |                            |
| Rhodo_F        | GGGTTCTTCCACGGGAT           | 84                 | <i>Rhodococcus</i> sp.     |
| Rhodo_R        | CCTTTGAGTTTTAGCCTTG         |                    |                            |
| Lactob2_F      | GAGGCAGCAGTAGGGAATCTTC      | 126                | <i>Lactobacillus</i> sp.   |
| Lactob2_R      | GGCCAGTTACTACCTCTATCCTTCTTC |                    |                            |
| Citro F1       | GTAAAGTACTTTTCAGCGAG        | 216                | <i>Citrobacter</i> sp.     |
| Citro R2       | GTTTCGGATGCAGTTCCC          |                    |                            |
| Prevo_F        | CACGGTAAACGATGGATGCC        | 113                | <i>Prevotella</i> sp.      |
| Prevo_R        | CAATTCCTTTGAGTTTCACC        |                    |                            |
| Strepto_F      | TGTCGTGAGATGTTGGGTTAAG      | 112                | <i>Streptococcus</i> sp.   |
| Strepto_R      | CCACCTTCCTCCGGTTTATTAC      |                    |                            |
| 340F§          | TCCTACGGGAGGCAGCAGT         | 198                | Universal                  |
| 515R§          | CGTATTACCGCGGCTGCTGGCAC     |                    |                            |

\*Rinttila T *et al.*, Journal of Applied Microbiology 2004.[8]

§Horz HP *et al.*, Journal of Clinical Microbiology 2005.[9]

**Supplementary Table S4.** Quality control results of 32 gastric samples derived from 16 subjects of the discovery set distributed across amplification and sequencing sets\*.

| Microbiota measurement                   | Intraclass correlation coefficient <sup>#</sup><br>ICC (95% CI) | <i>P</i> <sup>§</sup> |
|------------------------------------------|-----------------------------------------------------------------|-----------------------|
| <b>Alpha diversity (Shannon index)</b>   | 0.70 (-0.23 – 0.92)                                             | < 0.0001              |
| <b>Beta diversity<sup>&amp;</sup></b>    |                                                                 |                       |
| Unweighted UniFrac                       | 0.67 (-0.05 – 0.89)                                             | 0.003                 |
| Weighted UniFrac                         | 0.91 (0.64 – 0.97)                                              | < 0.0001              |
| <b>Relative abundance of major phyla</b> |                                                                 |                       |
| <i>Proteobacteria</i>                    | 0.69 (0.07 – 0.89)                                              | 0.004                 |
| <i>Firmicutes</i>                        | 0.62 (-0.05 – 0.86)                                             | 0.034                 |
| <i>Bacteroidetes</i>                     | 0.66 (0.07 – 0.88)                                              | 0.01                  |
| <i>Fusobacteria</i>                      | 0.73 (0.27 – 0.91)                                              | 0.005                 |

ICC, Intraclass correlation coefficient; CI, confidence intervals.

\*The 16S rRNA reads were analyzed using the UPARSE pipeline applying the same quality filtering parameters for each set of sequencing (maximum expected errors of 0.50 and global trimming of 250nt).

<sup>#</sup>Intraclass correlation coefficients were computed assuming the two-way mixed average measures model and using the absolute agreement definition. Higher ICC and lower *P*-value indicate better reproducibility.

<sup>§</sup>*P*-values obtained by analysis of variance (ANOVA) for the proportion of variance estimated for between subjects.

<sup>&</sup>First principal coordinate of weighted UniFrac distance matrix.



**Supplementary Table S5.** Correlations between the relative abundance of *Helicobacter* spp. and other phyla.

| <b>Taxa</b>                            | <b>Chronic gastritis<br/>(<math>\rho^*</math> and <i>P</i> - value)</b> | <b>Gastric carcinoma<br/>(<math>\rho^*</math> and <i>P</i> - value)</b> |
|----------------------------------------|-------------------------------------------------------------------------|-------------------------------------------------------------------------|
| <i>Non-Helicobacter Proteobacteria</i> | -0.59 ( <i>P</i> < 0.0001)                                              | -0.14 ( <i>P</i> = 0.2640)                                              |
| <i>Firmicutes</i>                      | -0.49 ( <i>P</i> < 0.0001)                                              | 0.05 ( <i>P</i> = 0.6889)                                               |
| <i>Bacteroidetes</i>                   | -0.43 ( <i>P</i> < 0.0001)                                              | 0.48 ( <i>P</i> = 0.0003)                                               |
| <i>Actinobacteria</i>                  | -0.54 ( <i>P</i> < 0.0001)                                              | -0.17 ( <i>P</i> = 0.2405)                                              |
| <i>Fusobacteria</i>                    | -0.15 ( <i>P</i> = 0.1750)                                              | 0.29 ( <i>P</i> = 0.0352)                                               |

\* $\rho$ , Spearman's rank coefficient.

**Supplementary Table S6.** Predicted KEGG Pathways differentially abundant between chronic gastritis and gastric carcinoma.

| KEGG_Pathways                                                   | Chronic gastritis<br>mean rel. freq.<br>(%) | Gastric carcinoma<br>mean rel. freq.<br>(%) | P-values<br>(corrected)* | LDA score | P-value<br>(LEfSe)# | Enriched<br>Category |
|-----------------------------------------------------------------|---------------------------------------------|---------------------------------------------|--------------------------|-----------|---------------------|----------------------|
| Environmental Information Processing Membrane Transport         | 10.92161                                    | 15.12360                                    | 0.00819                  | 4.33586   | 1.44E-13            | GC                   |
| Metabolism Carbohydrate Metabolism                              | 9.03294                                     | 9.83316                                     | 0.00178                  | 3.61487   | 8.98E-05            | GC                   |
| Genetic Information Processing Transcription                    | 1.88669                                     | 2.63088                                     | 0.00273                  | 3.59340   | 4.64E-16            | GC                   |
| Metabolism Xenobiotics Biodegradation and Metabolism            | 2.50552                                     | 3.28664                                     | 0.00216                  | 3.56750   | 1.54E-06            | GC                   |
| Unclassified Cellular Processes and Signaling                   | 3.70073                                     | 4.38594                                     | 0.00186                  | 3.53616   | 2.97E-09            | GC                   |
| Unclassified Poorly Characterized                               | 4.57739                                     | 5.11194                                     | 0.00241                  | 3.44255   | 3.58E-11            | GC                   |
| Unclassified Metabolism                                         | 2.19640                                     | 2.66576                                     | 0.00410                  | 3.38182   | 6.97E-12            | GC                   |
| Environmental Information Processing Signal Transduction        | 1.97292                                     | 2.39848                                     | 0.00315                  | 3.32954   | 4.67E-07            | GC                   |
| Metabolism Amino Acid Metabolism                                | 9.43605                                     | 9.81096                                     | 0.04352                  | 3.23132   | 1.19E-02            | GC                   |
| Metabolism Lipid Metabolism                                     | 3.03535                                     | 3.37183                                     | 0.00228                  | 3.22117   | 1.87E-05            | GC                   |
| Metabolism Biosynthesis of Other Secondary Metabolites          | 0.61655                                     | 0.75324                                     | 0.02048                  | 2.86853   | 3.31E-08            | GC                   |
| Metabolism Enzyme Families                                      | 1.79516                                     | 1.91412                                     | 0.00282                  | 2.86758   | 3.75E-04            | GC                   |
| Metabolism Metabolism of Other Amino Acids                      | 1.77550                                     | 1.87891                                     | 0.00410                  | 2.77646   | 7.74E-05            | GC                   |
| Organismal Systems Excretory System                             | 0.01130                                     | 0.02874                                     | 0.01365                  | 2.67809   | 7.84E-11            | GC                   |
| Genetic Information Processing Replication and Repair           | 8.79776                                     | 6.76323                                     | 0.00195                  | 4.00196   | 1.32E-12            | CGa                  |
| Genetic Information Processing Translation                      | 5.77603                                     | 4.16490                                     | 0.00256                  | 3.89954   | 2.36E-12            | CGa                  |
| Metabolism Energy Metabolism                                    | 6.03451                                     | 5.00229                                     | 0.00146                  | 3.72885   | 1.63E-16            | CGa                  |
| Unclassified Genetic Information Processing                     | 3.25102                                     | 2.34838                                     | 0.00171                  | 3.65858   | 2.24E-15            | CGa                  |
| Cellular Processes Cell Motility                                | 3.79669                                     | 2.98665                                     | 0.00455                  | 3.64273   | 1.26E-03            | CGa                  |
| Metabolism Glycan Biosynthesis and Metabolism                   | 2.80951                                     | 1.96937                                     | 0.00341                  | 3.62993   | 4.66E-14            | CGa                  |
| Metabolism Nucleotide Metabolism                                | 3.92975                                     | 3.13489                                     | 0.04096                  | 3.59115   | 3.17E-11            | CGa                  |
| Genetic Information Processing Folding, Sorting and Degradation | 2.82319                                     | 2.24511                                     | 0.00158                  | 3.47981   | 1.33E-14            | CGa                  |
| Metabolism Metabolism of Cofactors and Vitamins                 | 4.34925                                     | 3.85149                                     | 0.00293                  | 3.41535   | 4.34E-12            | CGa                  |
| Human Diseases Neurodegenerative Diseases                       | 0.52178                                     | 0.32498                                     | 0.00585                  | 3.11480   | 1.09E-10            | CGa                  |
| Organismal Systems Circulatory System                           | 0.10186                                     | 0.04917                                     | 0.00152                  | 2.97205   | 5.55E-10            | CGa                  |
| Cellular Processes Cell Growth and Death                        | 0.59027                                     | 0.42469                                     | 0.01024                  | 2.96612   | 8.95E-13            | CGa                  |
| Human Diseases Metabolic Diseases                               | 0.07488                                     | 0.07169                                     | 0.29446                  | 2.91240   | 4.92E-02            | CGa                  |
| Human Diseases Cancers                                          | 0.17859                                     | 0.13235                                     | 0.00205                  | 2.80085   | 2.31E-08            | CGa                  |

|                                                                          |         |         |         |         |          |     |
|--------------------------------------------------------------------------|---------|---------|---------|---------|----------|-----|
| Environmental Information Processing Signaling Molecules and Interaction | 0.29797 | 0.20385 | 0.00372 | 2.76556 | 1.05E-11 | CGa |
| Organismal Systems Environmental Adaptation                              | 0.17243 | 0.13526 | 0.00164 | 2.70978 | 3.76E-08 | CGa |
| Human Diseases Immune System Diseases                                    | 0.06094 | 0.04869 | 0.00683 | 2.69694 | 3.57E-08 | CGa |
| Organismal Systems Immune System                                         | 0.07854 | 0.05444 | 0.00512 | 2.63043 | 4.56E-07 | CGa |
| Organismal Systems Endocrine System                                      | 0.24091 | 0.25913 | 0.29240 | -       | -        | -   |
| Cellular Processes Cell Communication                                    | 0.00000 | 0.00000 | 1.02500 | -       | -        | -   |
| Metabolism Metabolism of Terpenoids and Polyketides                      | 1.77672 | 1.77557 | 1.03658 | -       | -        | -   |
| Organismal Systems Sensory System                                        | 0.00000 | 0.00000 | 1.00000 | -       | -        | -   |
| Human Diseases Cardiovascular Diseases                                   | 0.00841 | 0.01131 | 0.15661 | -       | -        | -   |
| Human Diseases Infectious Diseases                                       | 0.51979 | 0.49543 | 0.13653 | -       | -        | -   |
| Cellular Processes Transport and Catabolism                              | 0.24157 | 0.23500 | 0.57989 | -       | -        | -   |
| Organismal Systems Nervous System                                        | 0.07261 | 0.08275 | 0.02510 | -       | -        | -   |
| Organismal Systems Digestive System                                      | 0.03089 | 0.03518 | 0.18139 | -       | -        | -   |

\*White's non-parametric t-test corrected with Benjaminin-Hochberg FDR

#Wilcoxon test

**Supplementary Table S7 (A-F).** Predicted metagenome of the gastric microbiota using clusters of orthologous groups (COG) in PICRUSt.[4] Predicted COG and KO functions were analysed in STAMP[5] using the two-group comparison with White's non-parametric *t* test[6] and corrected for multiple test with Benjamini-Hochberg false discovery rate. The accuracy of the predicted metagenomes was assessed by determining the NSTI value for each microbiome sample.

**Panel A**, contains the selected COG and KO functions predicted with the whole bacterial community; **Panel B**, contains the weighted NSTI values for each microbiome sample predicted (COG functions) with the whole bacterial community; **Panel C**, contains the weighted NSTI values for each microbiome sample predicted (KO functions) with the whole bacterial community; **Panel D**, contains the selected COG and KO functions predicted with 10 genera differentially abundant in the two patient groups (by LEfSe analysis); **Panel E**, contains the weighted NSTI values for each microbiome sample predicted (COG functions) with 10 genera differentially abundant in the two patient groups (by LEfSe analysis); **Panel F**, contains the weighted NSTI values for each microbiome sample predicted (KO functions) with 10 genera differentially abundant in the two patient groups (by LEfSe analysis).

**Panel A.**

| Selected COG functions predicted with the whole bacterial community |                                        |                                  |                                        |                                  |                      |                          |                    |                   |
|---------------------------------------------------------------------|----------------------------------------|----------------------------------|----------------------------------------|----------------------------------|----------------------|--------------------------|--------------------|-------------------|
| #COG                                                                | Chronic_gastritis: mean rel. freq. (%) | Chronic_gastritis: std. dev. (%) | Gastric_carcinoma: mean rel. freq. (%) | Gastric_carcinoma: std. dev. (%) | p-values (corrected) | Difference between means | 95.0% lower CI     | 95.0% upper CI    |
| COG0600                                                             | 0.0380803377962                        | 0.0409023940591                  | 0.144434615098                         | 0.0623153699431                  | 0.00232614809874     | -0.106354277302          | -0.125221671315    | -0.0858149024638  |
| COG0715                                                             | 0.0511934133291                        | 0.0458494571997                  | 0.157705490347                         | 0.0545866953999                  | 0.00562539692974     | -0.106512077018          | -0.123411161547    | -0.0869708850513  |
| COG1116                                                             | 0.0367227762667                        | 0.0375718046599                  | 0.134767467249                         | 0.0547153422806                  | 0.0162278399567      | -0.0980446909824         | -0.113905723223    | -0.0821855767254  |
| COG1140                                                             | 0.0025440844066                        | 0.00668464772303                 | 0.0155970995959                        | 0.0148806082199                  | 0.00415556665557     | -0.0130530151893         | -0.017275905303    | -0.00882205712479 |
| COG1251                                                             | 0.011611977352                         | 0.0151913533865                  | 0.0519315230767                        | 0.0265861055036                  | 0.0137960022686      | -0.0403195457247         | -0.0485243035945   | -0.0319322400119  |
| COG2116                                                             | 0.0233649620796                        | 0.0215994256599                  | 0.0383015898969                        | 0.0250015856269                  | 0.00383590768206     | -0.0149366278173         | -0.0224787062647   | -0.00737941715869 |
| COG2146                                                             | 0.00873193589374                       | 0.0106158185296                  | 0.0393208615594                        | 0.0228568326087                  | 0.00404667184042     | -0.0305889256656         | -0.0370139696261   | -0.0238474856576  |
| COG2180                                                             | 0.0025440844066                        | 0.00668464772303                 | 0.0155970995959                        | 0.0148806082199                  | 0.00246255801811     | -0.0130530151893         | -0.0174246808685   | -0.0088974980323  |
| COG2181                                                             | 0.0025440844066                        | 0.00668464772303                 | 0.0155970995959                        | 0.0148806082199                  | 0.00536082059038     | -0.0130530151893         | -0.017255501534    | -0.00875565238332 |
| COG2223                                                             | 0.0325291097158                        | 0.0393469296998                  | 0.102362968402                         | 0.0569046880422                  | 0.00538494126796     | -0.0698338586861         | -0.0868249683248   | -0.0530108581266  |
| COG3005                                                             | 0.00488371320348                       | 0.00661558452324                 | 0.0058839829874                        | 0.00724089219848                 | 0.545794864476       | -0.00100026978392        | -0.00336821329968  | 0.00138511644863  |
| COG3043                                                             | 0.000775554391147                      | 0.00136327433874                 | 0.00373812723423                       | 0.00526742345456                 | 0.00291015974907     | -0.00296257284309        | -0.00449609407818  | -0.001519306695   |
| COG3062                                                             | 0.000775554391147                      | 0.00136327433874                 | 0.00373812723423                       | 0.00526742345456                 | 0.00240080882007     | -0.00296257284309        | -0.00452292313383  | -0.00156887470169 |
| COG3301                                                             | 0.00110220332143                       | 0.00305540177519                 | 0.00558613612147                       | 0.00725633566029                 | 0.00396292449273     | -0.00448393280004        | -0.00645199014736  | -0.00259824027501 |
| COG3303                                                             | 0.00410815881234                       | 0.00672591354877                 | 0.00214585575317                       | 0.0048409549419                  | 0.0601975829892      | 0.00196230305917         | 0.0000265626740328 | 0.00375532751947  |
| COG4459                                                             | 0.000775554391147                      | 0.00136327433874                 | 0.00373812723423                       | 0.00526742345456                 | 0.00220101737343     | -0.00296257284309        | -0.00452548718722  | -0.00152154912066 |
| COG5013                                                             | 0.00254435706316                       | 0.00668457771702                 | 0.016518260486                         | 0.0143514761835                  | 0.136777508206       | -0.0139739034229         | -0.0180142674333   | -0.00970549825398 |
| Selected KO functions predicted with the whole bacterial community  |                                        |                                  |                                        |                                  |                      |                          |                    |                   |
| #KO                                                                 | Chronic_gastritis: mean rel. freq. (%) | Chronic_gastritis: std. dev. (%) | Gastric_carcinoma: mean rel. freq. (%) | Gastric_carcinoma: std. dev. (%) | p-values (corrected) | Difference between means | 95.0% lower CI     | 95.0% upper CI    |
| K02575                                                              | 0.019212388                            | 0.017022566                      | 0.038842644                            | 0.016814508                      | 0.002251173          | -0.019630256             | -0.025259151       | -0.013779889      |
| K00374                                                              | 0.005812651                            | 0.006131977                      | 0.011933115                            | 0.009218057                      | 0.0037737            | -0.006120464             | -0.00876988        | -0.003022912      |
| K00371                                                              | 0.003691426                            | 0.004422298                      | 0.011473263                            | 0.009304943                      | 0.003769578          | -0.007781837             | -0.01046599        | -0.005165154      |
| K00370                                                              | 0.00585703                             | 0.006274888                      | 0.011669446                            | 0.009237582                      | 0.003767521          | -0.005812416             | -0.00887716        | -0.003032478      |
| K00362                                                              | 0.015170144                            | 0.014939699                      | 0.029964508                            | 0.018805713                      | 0.002091545          | -0.014794365             | -0.020454654       | -0.008977207      |
| K00363                                                              | 0.013528508                            | 0.013678413                      | 0.021447784                            | 0.013696811                      | 0.002090911          | -0.007919277             | -0.01298771        | -0.003372292      |

|        |             |             |             |             |             |              |              |              |
|--------|-------------|-------------|-------------|-------------|-------------|--------------|--------------|--------------|
| K00368 | 0.006984151 | 0.007328579 | 0.012471795 | 0.012708158 | 0.011156408 | -0.005487644 | -0.009290866 | -0.001638056 |
| K03385 | 0.00473815  | 0.006007843 | 0.002046396 | 0.00567851  | 0.011201674 | 0.002691754  | 0.000679126  | 0.004591805  |

**Panel B.**

| Weighted NSTI values for each microbiome sample predicted with the whole bacterial community: COG functions |                   |               |                 |
|-------------------------------------------------------------------------------------------------------------|-------------------|---------------|-----------------|
| GC1                                                                                                         | Gastric_carcinoma | Weighted NSTI | 0.040489631851  |
| GC2                                                                                                         | Gastric_carcinoma | Weighted NSTI | 0.0264613580275 |
| GC3                                                                                                         | Gastric_carcinoma | Weighted NSTI | 0.0389247982662 |
| GC4                                                                                                         | Gastric_carcinoma | Weighted NSTI | 0.0269396264775 |
| GC5                                                                                                         | Gastric_carcinoma | Weighted NSTI | 0.0643272483964 |
| GC6                                                                                                         | Gastric_carcinoma | Weighted NSTI | 0.034023649827  |
| GC7                                                                                                         | Gastric_carcinoma | Weighted NSTI | 0.033400643341  |
| GC8                                                                                                         | Gastric_carcinoma | Weighted NSTI | 0.0358000414837 |
| GC9                                                                                                         | Gastric_carcinoma | Weighted NSTI | 0.093279905086  |
| GC10                                                                                                        | Gastric_carcinoma | Weighted NSTI | 0.0936946331635 |
| GC11                                                                                                        | Gastric_carcinoma | Weighted NSTI | 0.0366245943864 |
| GC12                                                                                                        | Gastric_carcinoma | Weighted NSTI | 0.0287537167868 |
| GC13                                                                                                        | Gastric_carcinoma | Weighted NSTI | 0.0382200425585 |
| GC14                                                                                                        | Gastric_carcinoma | Weighted NSTI | 0.0362654260905 |
| GC15                                                                                                        | Gastric_carcinoma | Weighted NSTI | 0.0472873255435 |
| GC16                                                                                                        | Gastric_carcinoma | Weighted NSTI | 0.0307910984753 |
| GC17                                                                                                        | Gastric_carcinoma | Weighted NSTI | 0.0383074646772 |
| GC18                                                                                                        | Gastric_carcinoma | Weighted NSTI | 0.0147998010024 |
| GC19                                                                                                        | Gastric_carcinoma | Weighted NSTI | 0.0250345494043 |
| GC20                                                                                                        | Gastric_carcinoma | Weighted NSTI | 0.0196118356432 |
| GC21                                                                                                        | Gastric_carcinoma | Weighted NSTI | 0.0554188523192 |
| GC22                                                                                                        | Gastric_carcinoma | Weighted NSTI | 0.0185227799536 |
| GC23                                                                                                        | Gastric_carcinoma | Weighted NSTI | 0.119390269582  |
| GC24                                                                                                        | Gastric_carcinoma | Weighted NSTI | 0.0354898499502 |
| GC25                                                                                                        | Gastric_carcinoma | Weighted NSTI | 0.0288768762561 |
| GC26                                                                                                        | Gastric_carcinoma | Weighted NSTI | 0.0200459069109 |
| GC27                                                                                                        | Gastric_carcinoma | Weighted NSTI | 0.0224176229194 |
| GC28                                                                                                        | Gastric_carcinoma | Weighted NSTI | 0.0310864469154 |
| GC29                                                                                                        | Gastric_carcinoma | Weighted NSTI | 0.0584871720662 |
| GC30                                                                                                        | Gastric_carcinoma | Weighted NSTI | 0.0380997257276 |
| GC31                                                                                                        | Gastric_carcinoma | Weighted NSTI | 0.0199768652024 |
| GC32                                                                                                        | Gastric_carcinoma | Weighted NSTI | 0.0326920914222 |
| GC33                                                                                                        | Gastric_carcinoma | Weighted NSTI | 0.0793141787269 |
| GC34                                                                                                        | Gastric_carcinoma | Weighted NSTI | 0.0408301561178 |
| GC35                                                                                                        | Gastric_carcinoma | Weighted NSTI | 0.174612125786  |
| GC36                                                                                                        | Gastric_carcinoma | Weighted NSTI | 0.0367613957595 |
| GC37                                                                                                        | Gastric_carcinoma | Weighted NSTI | 0.0346428244292 |
| GC38                                                                                                        | Gastric_carcinoma | Weighted NSTI | 0.0271150607156 |
| GC39                                                                                                        | Gastric_carcinoma | Weighted NSTI | 0.0344307993816 |
| GC40                                                                                                        | Gastric_carcinoma | Weighted NSTI | 0.0666759514741 |
| GC41                                                                                                        | Gastric_carcinoma | Weighted NSTI | 0.0335315244906 |
| GC42                                                                                                        | Gastric_carcinoma | Weighted NSTI | 0.030448097136  |
| GC43                                                                                                        | Gastric_carcinoma | Weighted NSTI | 0.0747453733925 |
| GC44                                                                                                        | Gastric_carcinoma | Weighted NSTI | 0.0283546264849 |
| GC45                                                                                                        | Gastric_carcinoma | Weighted NSTI | 0.0428279962603 |
| GC46                                                                                                        | Gastric_carcinoma | Weighted NSTI | 0.0377074018348 |
| GC47                                                                                                        | Gastric_carcinoma | Weighted NSTI | 0.0460050016118 |
| GC48                                                                                                        | Gastric_carcinoma | Weighted NSTI | 0.0517707933249 |
| GC49                                                                                                        | Gastric_carcinoma | Weighted NSTI | 0.0147181524782 |
| GC50                                                                                                        | Gastric_carcinoma | Weighted NSTI | 0.0264651673989 |
| GC51                                                                                                        | Gastric_carcinoma | Weighted NSTI | 0.0310639160311 |
| GC52                                                                                                        | Gastric_carcinoma | Weighted NSTI | 0.0282792295803 |
| GC53                                                                                                        | Gastric_carcinoma | Weighted NSTI | 0.0753222820128 |
| GC54                                                                                                        | Gastric_carcinoma | Weighted NSTI | 0.0394247749183 |
| Ga1                                                                                                         | Chronic_gastritis | Weighted NSTI | 0.0908111634672 |
| Ga2                                                                                                         | Chronic_gastritis | Weighted NSTI | 0.0346916585769 |
| Ga3                                                                                                         | Chronic_gastritis | Weighted NSTI | 0.117402392327  |
| Ga4                                                                                                         | Chronic_gastritis | Weighted NSTI | 0.121956578849  |
| Ga5                                                                                                         | Chronic_gastritis | Weighted NSTI | 0.0443341197835 |
| Ga6                                                                                                         | Chronic_gastritis | Weighted NSTI | 0.0564023880138 |
| Ga7                                                                                                         | Chronic_gastritis | Weighted NSTI | 0.057121902691  |
| Ga8                                                                                                         | Chronic_gastritis | Weighted NSTI | 0.0283503088713 |
| Ga9                                                                                                         | Chronic_gastritis | Weighted NSTI | 0.122618605685  |
| Ga10                                                                                                        | Chronic_gastritis | Weighted NSTI | 0.137675241471  |
| Ga11                                                                                                        | Chronic_gastritis | Weighted NSTI | 0.0313511145222 |
| Ga12                                                                                                        | Chronic_gastritis | Weighted NSTI | 0.0359385545363 |
| Ga13                                                                                                        | Chronic_gastritis | Weighted NSTI | 0.0267607348016 |
| Ga14                                                                                                        | Chronic_gastritis | Weighted NSTI | 0.0399913286286 |
| Ga15                                                                                                        | Chronic_gastritis | Weighted NSTI | 0.0334904226307 |
| Ga16                                                                                                        | Chronic_gastritis | Weighted NSTI | 0.0555738114619 |
| Ga17                                                                                                        | Chronic_gastritis | Weighted NSTI | 0.0590495787144 |

|      |                   |               |                 |
|------|-------------------|---------------|-----------------|
| Ga18 | Chronic_gastritis | Weighted NSTI | 0.0310918907492 |
| Ga19 | Chronic_gastritis | Weighted NSTI | 0.0381330828939 |
| Ga20 | Chronic_gastritis | Weighted NSTI | 0.030050458735  |
| Ga21 | Chronic_gastritis | Weighted NSTI | 0.0293018480457 |
| Ga22 | Chronic_gastritis | Weighted NSTI | 0.0406953226685 |
| Ga23 | Chronic_gastritis | Weighted NSTI | 0.0319070615753 |
| Ga24 | Chronic_gastritis | Weighted NSTI | 0.0305824730562 |
| Ga25 | Chronic_gastritis | Weighted NSTI | 0.0317728785598 |
| Ga26 | Chronic_gastritis | Weighted NSTI | 0.0270866195057 |
| Ga27 | Chronic_gastritis | Weighted NSTI | 0.0313910654489 |
| Ga28 | Chronic_gastritis | Weighted NSTI | 0.0258875683418 |
| Ga29 | Chronic_gastritis | Weighted NSTI | 0.0313598318794 |
| Ga30 | Chronic_gastritis | Weighted NSTI | 0.0711050885032 |
| Ga31 | Chronic_gastritis | Weighted NSTI | 0.0244993143869 |
| Ga32 | Chronic_gastritis | Weighted NSTI | 0.024942786618  |
| Ga33 | Chronic_gastritis | Weighted NSTI | 0.030719788708  |
| Ga34 | Chronic_gastritis | Weighted NSTI | 0.0261586219593 |
| Ga35 | Chronic_gastritis | Weighted NSTI | 0.0304169841173 |
| Ga36 | Chronic_gastritis | Weighted NSTI | 0.0313967257136 |
| Ga37 | Chronic_gastritis | Weighted NSTI | 0.0256214740952 |
| Ga38 | Chronic_gastritis | Weighted NSTI | 0.0406025576612 |
| Ga39 | Chronic_gastritis | Weighted NSTI | 0.0236312029641 |
| Ga40 | Chronic_gastritis | Weighted NSTI | 0.0265096285674 |
| Ga41 | Chronic_gastritis | Weighted NSTI | 0.0235599356195 |
| Ga42 | Chronic_gastritis | Weighted NSTI | 0.0326502167956 |
| Ga43 | Chronic_gastritis | Weighted NSTI | 0.0316268011843 |
| Ga44 | Chronic_gastritis | Weighted NSTI | 0.0243789299692 |
| Ga45 | Chronic_gastritis | Weighted NSTI | 0.0248214547776 |
| Ga46 | Chronic_gastritis | Weighted NSTI | 0.0263703541274 |
| Ga47 | Chronic_gastritis | Weighted NSTI | 0.0236490670651 |
| Ga48 | Chronic_gastritis | Weighted NSTI | 0.0419295596547 |
| Ga49 | Chronic_gastritis | Weighted NSTI | 0.0453555338905 |
| Ga50 | Chronic_gastritis | Weighted NSTI | 0.0395148501086 |
| Ga51 | Chronic_gastritis | Weighted NSTI | 0.0367415424425 |
| Ga52 | Chronic_gastritis | Weighted NSTI | 0.0434132457438 |
| Ga53 | Chronic_gastritis | Weighted NSTI | 0.0290510505889 |
| Ga54 | Chronic_gastritis | Weighted NSTI | 0.0522665861212 |
| Ga55 | Chronic_gastritis | Weighted NSTI | 0.0404586124022 |
| Ga56 | Chronic_gastritis | Weighted NSTI | 0.0412643460406 |
| Ga57 | Chronic_gastritis | Weighted NSTI | 0.0402077309941 |
| Ga58 | Chronic_gastritis | Weighted NSTI | 0.0253999624615 |
| Ga59 | Chronic_gastritis | Weighted NSTI | 0.0428094549349 |
| Ga60 | Chronic_gastritis | Weighted NSTI | 0.0378768132663 |
| Ga61 | Chronic_gastritis | Weighted NSTI | 0.0503554281182 |
| Ga62 | Chronic_gastritis | Weighted NSTI | 0.0485291220322 |
| Ga63 | Chronic_gastritis | Weighted NSTI | 0.0490305079779 |
| Ga64 | Chronic_gastritis | Weighted NSTI | 0.0934052073583 |
| Ga65 | Chronic_gastritis | Weighted NSTI | 0.0346860076556 |
| Ga66 | Chronic_gastritis | Weighted NSTI | 0.0463552549761 |
| Ga67 | Chronic_gastritis | Weighted NSTI | 0.0302419700077 |
| Ga68 | Chronic_gastritis | Weighted NSTI | 0.0357172222252 |
| Ga69 | Chronic_gastritis | Weighted NSTI | 0.0237149281501 |
| Ga70 | Chronic_gastritis | Weighted NSTI | 0.0448817341401 |
| Ga71 | Chronic_gastritis | Weighted NSTI | 0.0256301408615 |
| Ga72 | Chronic_gastritis | Weighted NSTI | 0.0387136886567 |
| Ga73 | Chronic_gastritis | Weighted NSTI | 0.038742864283  |
| Ga74 | Chronic_gastritis | Weighted NSTI | 0.031060976654  |
| Ga75 | Chronic_gastritis | Weighted NSTI | 0.0333810306831 |
| Ga76 | Chronic_gastritis | Weighted NSTI | 0.0252564503647 |
| Ga77 | Chronic_gastritis | Weighted NSTI | 0.0296099257201 |
| Ga78 | Chronic_gastritis | Weighted NSTI | 0.0797687144484 |
| Ga79 | Chronic_gastritis | Weighted NSTI | 0.055401172199  |
| Ga80 | Chronic_gastritis | Weighted NSTI | 0.0282654611359 |
| Ga81 | Chronic_gastritis | Weighted NSTI | 0.060914477945  |

**Panel C.**

| Weighted NSTI values for each microbiome sample predicted with the whole bacterial community: KO functions |                   |               |                 |
|------------------------------------------------------------------------------------------------------------|-------------------|---------------|-----------------|
| #Sample                                                                                                    | Clinical setting  | Metric        | Value           |
| GC1                                                                                                        | Gastric_carcinoma | Weighted NSTI | 0.040489631851  |
| GC2                                                                                                        | Gastric_carcinoma | Weighted NSTI | 0.0264613580275 |
| GC3                                                                                                        | Gastric_carcinoma | Weighted NSTI | 0.0389247982662 |
| GC4                                                                                                        | Gastric_carcinoma | Weighted NSTI | 0.0269396264775 |
| GC5                                                                                                        | Gastric_carcinoma | Weighted NSTI | 0.0643272483964 |
| GC6                                                                                                        | Gastric_carcinoma | Weighted NSTI | 0.034023649827  |
| GC7                                                                                                        | Gastric_carcinoma | Weighted NSTI | 0.033400643341  |
| GC8                                                                                                        | Gastric_carcinoma | Weighted NSTI | 0.0358000414837 |
| GC9                                                                                                        | Gastric_carcinoma | Weighted NSTI | 0.093279905086  |

|      |                   |               |                 |
|------|-------------------|---------------|-----------------|
| GC10 | Gastric_carcinoma | Weighted NSTI | 0.0936946331635 |
| GC11 | Gastric_carcinoma | Weighted NSTI | 0.0366245943864 |
| GC12 | Gastric_carcinoma | Weighted NSTI | 0.0287537167868 |
| GC13 | Gastric_carcinoma | Weighted NSTI | 0.0382200425585 |
| GC14 | Gastric_carcinoma | Weighted NSTI | 0.0362654260905 |
| GC15 | Gastric_carcinoma | Weighted NSTI | 0.0472873255435 |
| GC16 | Gastric_carcinoma | Weighted NSTI | 0.0307910984753 |
| GC17 | Gastric_carcinoma | Weighted NSTI | 0.0383074646772 |
| GC18 | Gastric_carcinoma | Weighted NSTI | 0.0147998010024 |
| GC19 | Gastric_carcinoma | Weighted NSTI | 0.0250345494043 |
| GC20 | Gastric_carcinoma | Weighted NSTI | 0.0196118356432 |
| GC21 | Gastric_carcinoma | Weighted NSTI | 0.0554188523192 |
| GC22 | Gastric_carcinoma | Weighted NSTI | 0.0185227799536 |
| GC23 | Gastric_carcinoma | Weighted NSTI | 0.119390269582  |
| GC24 | Gastric_carcinoma | Weighted NSTI | 0.0354898499502 |
| GC25 | Gastric_carcinoma | Weighted NSTI | 0.0288768762561 |
| GC26 | Gastric_carcinoma | Weighted NSTI | 0.0200459069109 |
| GC27 | Gastric_carcinoma | Weighted NSTI | 0.0224176229194 |
| GC28 | Gastric_carcinoma | Weighted NSTI | 0.0310864469154 |
| GC29 | Gastric_carcinoma | Weighted NSTI | 0.0584871720662 |
| GC30 | Gastric_carcinoma | Weighted NSTI | 0.0380997257276 |
| GC31 | Gastric_carcinoma | Weighted NSTI | 0.0199768652024 |
| GC32 | Gastric_carcinoma | Weighted NSTI | 0.0326920914222 |
| GC33 | Gastric_carcinoma | Weighted NSTI | 0.0793141787269 |
| GC34 | Gastric_carcinoma | Weighted NSTI | 0.0408301561178 |
| GC35 | Gastric_carcinoma | Weighted NSTI | 0.174612125786  |
| GC36 | Gastric_carcinoma | Weighted NSTI | 0.0367613957595 |
| GC37 | Gastric_carcinoma | Weighted NSTI | 0.0346428244292 |
| GC38 | Gastric_carcinoma | Weighted NSTI | 0.0271150607156 |
| GC39 | Gastric_carcinoma | Weighted NSTI | 0.0344307993816 |
| GC40 | Gastric_carcinoma | Weighted NSTI | 0.0666759514741 |
| GC41 | Gastric_carcinoma | Weighted NSTI | 0.0335315244906 |
| GC42 | Gastric_carcinoma | Weighted NSTI | 0.030448097136  |
| GC43 | Gastric_carcinoma | Weighted NSTI | 0.0747453733925 |
| GC44 | Gastric_carcinoma | Weighted NSTI | 0.0283546264849 |
| GC45 | Gastric_carcinoma | Weighted NSTI | 0.0428279962603 |
| GC46 | Gastric_carcinoma | Weighted NSTI | 0.0377074018348 |
| GC47 | Gastric_carcinoma | Weighted NSTI | 0.0460050016118 |
| GC48 | Gastric_carcinoma | Weighted NSTI | 0.0517707933249 |
| GC49 | Gastric_carcinoma | Weighted NSTI | 0.0147181524782 |
| GC50 | Gastric_carcinoma | Weighted NSTI | 0.0264651673989 |
| GC51 | Gastric_carcinoma | Weighted NSTI | 0.0310639160311 |
| GC52 | Gastric_carcinoma | Weighted NSTI | 0.0282792295803 |
| GC53 | Gastric_carcinoma | Weighted NSTI | 0.0753222820128 |
| GC54 | Gastric_carcinoma | Weighted NSTI | 0.0394247749183 |
| Ga1  | Chronic_gastritis | Weighted NSTI | 0.0908111634672 |
| Ga2  | Chronic_gastritis | Weighted NSTI | 0.0346916585769 |
| Ga3  | Chronic_gastritis | Weighted NSTI | 0.117402392327  |
| Ga4  | Chronic_gastritis | Weighted NSTI | 0.121956578849  |
| Ga5  | Chronic_gastritis | Weighted NSTI | 0.0443341197835 |
| Ga6  | Chronic_gastritis | Weighted NSTI | 0.0564023880138 |
| Ga7  | Chronic_gastritis | Weighted NSTI | 0.057121902691  |
| Ga8  | Chronic_gastritis | Weighted NSTI | 0.0283503088713 |
| Ga9  | Chronic_gastritis | Weighted NSTI | 0.122618605685  |
| Ga10 | Chronic_gastritis | Weighted NSTI | 0.137675241471  |
| Ga11 | Chronic_gastritis | Weighted NSTI | 0.0313511145222 |
| Ga12 | Chronic_gastritis | Weighted NSTI | 0.0359385545363 |
| Ga13 | Chronic_gastritis | Weighted NSTI | 0.0267607348016 |
| Ga14 | Chronic_gastritis | Weighted NSTI | 0.0399913286286 |
| Ga15 | Chronic_gastritis | Weighted NSTI | 0.0334904226307 |
| Ga16 | Chronic_gastritis | Weighted NSTI | 0.0555738114619 |
| Ga17 | Chronic_gastritis | Weighted NSTI | 0.0590495787144 |
| Ga18 | Chronic_gastritis | Weighted NSTI | 0.0310918907492 |
| Ga19 | Chronic_gastritis | Weighted NSTI | 0.0381330828939 |
| Ga20 | Chronic_gastritis | Weighted NSTI | 0.030050458735  |
| Ga21 | Chronic_gastritis | Weighted NSTI | 0.0293018480457 |
| Ga22 | Chronic_gastritis | Weighted NSTI | 0.0406953226685 |
| Ga23 | Chronic_gastritis | Weighted NSTI | 0.0319070615753 |
| Ga24 | Chronic_gastritis | Weighted NSTI | 0.0305824730562 |
| Ga25 | Chronic_gastritis | Weighted NSTI | 0.0317728785598 |
| Ga26 | Chronic_gastritis | Weighted NSTI | 0.0270866195057 |
| Ga27 | Chronic_gastritis | Weighted NSTI | 0.0313910654489 |
| Ga28 | Chronic_gastritis | Weighted NSTI | 0.0258875683418 |
| Ga29 | Chronic_gastritis | Weighted NSTI | 0.0313598318794 |
| Ga30 | Chronic_gastritis | Weighted NSTI | 0.0711050885032 |
| Ga31 | Chronic_gastritis | Weighted NSTI | 0.0244993143869 |
| Ga32 | Chronic_gastritis | Weighted NSTI | 0.024942786618  |
| Ga33 | Chronic_gastritis | Weighted NSTI | 0.030719788708  |
| Ga34 | Chronic_gastritis | Weighted NSTI | 0.0261586219593 |
| Ga35 | Chronic_gastritis | Weighted NSTI | 0.0304169841173 |
| Ga36 | Chronic_gastritis | Weighted NSTI | 0.0313967257136 |

|      |                   |               |                 |
|------|-------------------|---------------|-----------------|
| Ga37 | Chronic_gastritis | Weighted NSTI | 0.0256214740952 |
| Ga38 | Chronic_gastritis | Weighted NSTI | 0.0406025576612 |
| Ga39 | Chronic_gastritis | Weighted NSTI | 0.0236312029641 |
| Ga40 | Chronic_gastritis | Weighted NSTI | 0.0265096285674 |
| Ga41 | Chronic_gastritis | Weighted NSTI | 0.0235599356195 |
| Ga42 | Chronic_gastritis | Weighted NSTI | 0.0326502167956 |
| Ga43 | Chronic_gastritis | Weighted NSTI | 0.0316268011843 |
| Ga44 | Chronic_gastritis | Weighted NSTI | 0.0243789299692 |
| Ga45 | Chronic_gastritis | Weighted NSTI | 0.0248214547776 |
| Ga46 | Chronic_gastritis | Weighted NSTI | 0.0263703541274 |
| Ga47 | Chronic_gastritis | Weighted NSTI | 0.0236490670651 |
| Ga48 | Chronic_gastritis | Weighted NSTI | 0.0419295596547 |
| Ga49 | Chronic_gastritis | Weighted NSTI | 0.0453555338905 |
| Ga50 | Chronic_gastritis | Weighted NSTI | 0.0395148501086 |
| Ga51 | Chronic_gastritis | Weighted NSTI | 0.0367415424425 |
| Ga52 | Chronic_gastritis | Weighted NSTI | 0.0434132457438 |
| Ga53 | Chronic_gastritis | Weighted NSTI | 0.0290510505889 |
| Ga54 | Chronic_gastritis | Weighted NSTI | 0.0522665861212 |
| Ga55 | Chronic_gastritis | Weighted NSTI | 0.0404586124022 |
| Ga56 | Chronic_gastritis | Weighted NSTI | 0.0412643460406 |
| Ga57 | Chronic_gastritis | Weighted NSTI | 0.0402077309941 |
| Ga58 | Chronic_gastritis | Weighted NSTI | 0.0253999624615 |
| Ga59 | Chronic_gastritis | Weighted NSTI | 0.0428094549349 |
| Ga60 | Chronic_gastritis | Weighted NSTI | 0.0378768132663 |
| Ga61 | Chronic_gastritis | Weighted NSTI | 0.0503554281182 |
| Ga62 | Chronic_gastritis | Weighted NSTI | 0.0485291220322 |
| Ga63 | Chronic_gastritis | Weighted NSTI | 0.0490305079779 |
| Ga64 | Chronic_gastritis | Weighted NSTI | 0.0934052073583 |
| Ga65 | Chronic_gastritis | Weighted NSTI | 0.0346860076556 |
| Ga66 | Chronic_gastritis | Weighted NSTI | 0.0463552549761 |
| Ga67 | Chronic_gastritis | Weighted NSTI | 0.0302419700077 |
| Ga68 | Chronic_gastritis | Weighted NSTI | 0.035717222252  |
| Ga69 | Chronic_gastritis | Weighted NSTI | 0.0237149281501 |
| Ga70 | Chronic_gastritis | Weighted NSTI | 0.0448817341401 |
| Ga71 | Chronic_gastritis | Weighted NSTI | 0.0256301408615 |
| Ga72 | Chronic_gastritis | Weighted NSTI | 0.0387136886567 |
| Ga73 | Chronic_gastritis | Weighted NSTI | 0.038742864283  |
| Ga74 | Chronic_gastritis | Weighted NSTI | 0.031060976654  |
| Ga75 | Chronic_gastritis | Weighted NSTI | 0.0333810306831 |
| Ga76 | Chronic_gastritis | Weighted NSTI | 0.0252564503647 |
| Ga77 | Chronic_gastritis | Weighted NSTI | 0.0296099257201 |
| Ga78 | Chronic_gastritis | Weighted NSTI | 0.0797687144484 |
| Ga79 | Chronic_gastritis | Weighted NSTI | 0.055401172199  |
| Ga80 | Chronic_gastritis | Weighted NSTI | 0.0282654611359 |
| Ga81 | Chronic_gastritis | Weighted NSTI | 0.060914477945  |

**Panel D.**

| #COG    | Chronic_gastritis mean rel. freq. (%) | Chronic_gastritis std. dev. (%) | Gastric_carcinoma mean rel. freq. (%) | Gastric_carcinoma std. dev. (%) | p-values (corrected) | Difference between means | 95.0% lower CI     | 95.0% upper CI     |
|---------|---------------------------------------|---------------------------------|---------------------------------------|---------------------------------|----------------------|--------------------------|--------------------|--------------------|
| COG0600 | 0.0300418645333                       | 0.0460843980869                 | 0.146812141835                        | 0.0737182608186                 | 0.00231043088186     | -0.116770277302          | -0.138788727797    | -0.0945946985164   |
| COG0715 | 0.0314438736083                       | 0.0378427117516                 | 0.141752334688                        | 0.0701383419265                 | 0.00565196314901     | -0.11030846108           | -0.130485067169    | -0.0895309924737   |
| COG1116 | 0.0287626358989                       | 0.041888860315                  | 0.136926410484                        | 0.066415304397                  | 0.0161185615731      | -0.108163774585          | -0.128837496949    | -0.0887058740264   |
| COG1140 | 0.00341973019684                      | 0.00933044303473                | 0.0174785528014                       | 0.0151631416482                 | 0.00413046832374     | -0.0140588226046         | -0.0187097703159   | -0.00942096154861  |
| COG1251 | 0.00588295135724                      | 0.0139110162012                 | 0.0505727873507                       | 0.0317275825981                 | 0.0136387828696      | -0.0446898359934         | -0.0547299434599   | -0.0351107891734   |
| COG2116 | 0.0260441305425                       | 0.0264772369147                 | 0.0406912022371                       | 0.0264159913953                 | 0.00839272929034     | -0.0146470716946         | -0.0239204671983   | -0.00526594122529  |
| COG2146 | 0.00216100378478                      | 0.00477317428429                | 0.0333160685549                       | 0.0270121916546                 | 0.00401949016559     | -0.0311550647701         | -0.0387130722049   | -0.0241121414691   |
| COG2180 | 0.00341973019684                      | 0.00933044303473                | 0.0174785528014                       | 0.0151631416482                 | 0.00244995536705     | -0.0140588226046         | -0.0185814422875   | -0.00920331912275  |
| COG2181 | 0.00341973019684                      | 0.00933044303473                | 0.0174785528014                       | 0.0151631416482                 | 0.00539100539101     | -0.0140588226046         | -0.0184239543674   | -0.00958313672034  |
| COG2223 | 0.0304687792229                       | 0.04819766388                   | 0.0987132679002                       | 0.0636281509332                 | 0.00541539908056     | -0.0682444886773         | -0.0886157069943   | -0.0463657519206   |
| COG3005 | 0.0045568813437                       | 0.00692789916142                | 0.0076798560699                       | 0.00846065593                   | 0.052708949082       | -0.00312297472628        | -0.00583622152869  | -0.000214930074913 |
| COG3043 | 0.000004459489807                     | 0.00001909505648                | 0.004824471628                        | 0.00652515766495                | 0.00289782856369     | -0.00482001213819        | -0.00673429348284  | -0.00305935378494  |
| COG3062 | 0.000004459489807                     | 0.00001909505648                | 0.004824471628                        | 0.00652515766495                | 0.00238169790409     | -0.00482001213819        | -0.00659843293099  | -0.00315031401884  |
| COG3301 | 0.00170781910463                      | 0.00466443438518                | 0.0063267980526                       | 0.00731620351516                | 0.00393361773805     | -0.00461897894799        | -0.00686032626101  | -0.00248275954591  |
| COG3303 | 0.0045524218539                       | 0.00692771582096                | 0.0028553844419                       | 0.00594717363718                | 0.193659849192       | 0.00169703741191         | -0.000513423867157 | 0.00393403320397   |
| COG4459 | 0.000004459489807                     | 0.00001909505648                | 0.004824471628                        | 0.00652515766495                | 0.00218694051494     | -0.00482001213819        | -0.00662053015558  | -0.00317972339968  |
| COG5013 | 0.00342002704444                      | 0.00933034241022                | 0.0184927461628                       | 0.0144801404877                 | 0.11968031968        | -0.0150727191183         | -0.0194776299944   | -0.010939489594    |
| #KO     | Chronic_gastritis mean rel. freq. (%) | Chronic_gastritis std. dev. (%) | Gastric_carcinoma mean rel. freq. (%) | Gastric_carcinoma std. dev. (%) | p-values (corrected) | Difference between means | 95.0% lower CI     | 95.0% upper CI     |
| K02575  | 0.004509995                           | 0.012372823                     | 0.025966323                           | 0.019687365                     | 0.002297636          | -0.021456328             | -0.027262001       | -0.01542714        |
| K00374  | 0.002257451                           | 0.006187414                     | 0.01563650                            | 0.012771472                     | 0.004038676          | -0.013379049             | -0.017113515       | -0.009667895       |
| K00371  | 0.002257451                           | 0.006187414                     | 0.01563650                            | 0.012771472                     | 0.004036315          | -0.013379049             | -0.016970983       | -0.009580145       |
| K00370  | 0.002257451                           | 0.006187414                     | 0.01563650                            | 0.012771472                     | 0.004033956          | -0.013379049             | -0.016896677       | -0.009447808       |
| K00362  | 0.004510228                           | 0.012372741                     | 0.025965619                           | 0.019687411                     | 0.002109443          | -0.021455391             | -0.027549823       | -0.015594188       |
| K00363  | 0.002258658                           | 0.006187010                     | 0.018956808                           | 0.014490694                     | 0.002108799          | -0.016698150             | -0.020845732       | -0.012818462       |
| K00368  | 0.005625786                           | 0.008819855                     | 0.004356963                           | 0.007688918                     | 0.681206315          | 0.001268823              | -0.001531841       | 0.004088364        |
| K03385  | 0.005919455                           | 0.010112995                     | 0.004099644                           | 0.008672612                     | 0.489792805          | 0.001819811              | -0.001240937       | 0.004759555        |



**Panel E.**

Weighted NSTI values for each microbiome sample predicted with 10 genera differentially abundant in the two patient groups (by LEfSe analysis): COG functions

| #Sample | Clinical setting  | Metric        | Value            |
|---------|-------------------|---------------|------------------|
| GC1     | Gastric_carcinoma | Weighted NSTI | 0.00930809485847 |
| GC2     | Gastric_carcinoma | Weighted NSTI | 0.0240044368429  |
| GC3     | Gastric_carcinoma | Weighted NSTI | 0.0109010814095  |
| GC4     | Gastric_carcinoma | Weighted NSTI | 0.0145213951541  |
| GC5     | Gastric_carcinoma | Weighted NSTI | 0.023718870231   |
| GC6     | Gastric_carcinoma | Weighted NSTI | 0.0293275862309  |
| GC7     | Gastric_carcinoma | Weighted NSTI | 0.00497999715557 |
| GC8     | Gastric_carcinoma | Weighted NSTI | 0.023024085928   |
| GC9     | Gastric_carcinoma | Weighted NSTI | 0.0937727775039  |
| GC10    | Gastric_carcinoma | Weighted NSTI | 0.0938399144357  |
| GC11    | Gastric_carcinoma | Weighted NSTI | 0.0231372989755  |
| GC12    | Gastric_carcinoma | Weighted NSTI | 0.0102467154304  |
| GC13    | Gastric_carcinoma | Weighted NSTI | 0.0345476705214  |
| GC14    | Gastric_carcinoma | Weighted NSTI | 0.00921013087128 |
| GC15    | Gastric_carcinoma | Weighted NSTI | 0.0414846156894  |
| GC16    | Gastric_carcinoma | Weighted NSTI | 0.0423956274665  |
| GC17    | Gastric_carcinoma | Weighted NSTI | 0.0154562656542  |
| GC18    | Gastric_carcinoma | Weighted NSTI | 0.0136105222154  |
| GC19    | Gastric_carcinoma | Weighted NSTI | 0.0134520120571  |
| GC20    | Gastric_carcinoma | Weighted NSTI | 0.0139521366017  |
| GC21    | Gastric_carcinoma | Weighted NSTI | 0.0645339594707  |
| GC22    | Gastric_carcinoma | Weighted NSTI | 0.0133382328625  |
| GC23    | Gastric_carcinoma | Weighted NSTI | 0.0354155953905  |
| GC24    | Gastric_carcinoma | Weighted NSTI | 0.0208627090301  |
| GC25    | Gastric_carcinoma | Weighted NSTI | 0.0181078888419  |
| GC26    | Gastric_carcinoma | Weighted NSTI | 0.0144227683349  |
| GC27    | Gastric_carcinoma | Weighted NSTI | 0.0160166205041  |
| GC28    | Gastric_carcinoma | Weighted NSTI | 0.0233542930185  |
| GC29    | Gastric_carcinoma | Weighted NSTI | 0.025739929714   |
| GC30    | Gastric_carcinoma | Weighted NSTI | 0.0113294205463  |
| GC31    | Gastric_carcinoma | Weighted NSTI | 0.0148387168242  |
| GC32    | Gastric_carcinoma | Weighted NSTI | 0.0260766868078  |
| GC33    | Gastric_carcinoma | Weighted NSTI | 0.0804474660945  |
| GC34    | Gastric_carcinoma | Weighted NSTI | 0.0157898849295  |
| GC35    | Gastric_carcinoma | Weighted NSTI | 0.0367311418522  |
| GC36    | Gastric_carcinoma | Weighted NSTI | 0.0141705107879  |
| GC37    | Gastric_carcinoma | Weighted NSTI | 0.032360819261   |
| GC38    | Gastric_carcinoma | Weighted NSTI | 0.011977852744   |
| GC39    | Gastric_carcinoma | Weighted NSTI | 0.0181153823328  |
| GC40    | Gastric_carcinoma | Weighted NSTI | 0.0262472709806  |
| GC41    | Gastric_carcinoma | Weighted NSTI | 0.0164562967724  |
| GC42    | Gastric_carcinoma | Weighted NSTI | 0.0154662402134  |
| GC43    | Gastric_carcinoma | Weighted NSTI | 0.0381879853417  |
| GC44    | Gastric_carcinoma | Weighted NSTI | 0.0160909987093  |
| GC45    | Gastric_carcinoma | Weighted NSTI | 0.0218091017727  |
| GC46    | Gastric_carcinoma | Weighted NSTI | 0.0277717197922  |
| GC47    | Gastric_carcinoma | Weighted NSTI | 0.0368600029383  |
| GC48    | Gastric_carcinoma | Weighted NSTI | 0.0162168230646  |
| GC49    | Gastric_carcinoma | Weighted NSTI | 0.0152481813312  |
| GC50    | Gastric_carcinoma | Weighted NSTI | 0.0220793569132  |
| GC51    | Gastric_carcinoma | Weighted NSTI | 0.0233230434466  |
| GC52    | Gastric_carcinoma | Weighted NSTI | 0.0201161357312  |
| GC53    | Gastric_carcinoma | Weighted NSTI | 0.0202110531638  |
| GC54    | Gastric_carcinoma | Weighted NSTI | 0.0414352900421  |
| Ga1     | Chronic_gastritis | Weighted NSTI | 0.0308221809121  |
| Ga2     | Chronic_gastritis | Weighted NSTI | 0.0190175746876  |
| Ga3     | Chronic_gastritis | Weighted NSTI | 0.0222307471725  |
| Ga4     | Chronic_gastritis | Weighted NSTI | 0.0209507992895  |
| Ga5     | Chronic_gastritis | Weighted NSTI | 0.0319685746606  |
| Ga6     | Chronic_gastritis | Weighted NSTI | 0.0153921588649  |
| Ga7     | Chronic_gastritis | Weighted NSTI | 0.0217206904368  |
| Ga8     | Chronic_gastritis | Weighted NSTI | 0.0232925028465  |
| Ga9     | Chronic_gastritis | Weighted NSTI | 0.0247355306637  |
| Ga10    | Chronic_gastritis | Weighted NSTI | 0.0213686407209  |
| Ga11    | Chronic_gastritis | Weighted NSTI | 0.0233840454215  |
| Ga12    | Chronic_gastritis | Weighted NSTI | 0.0229725174811  |
| Ga13    | Chronic_gastritis | Weighted NSTI | 0.0236147972795  |
| Ga14    | Chronic_gastritis | Weighted NSTI | 0.0188148415636  |
| Ga15    | Chronic_gastritis | Weighted NSTI | 0.0239628754086  |
| Ga16    | Chronic_gastritis | Weighted NSTI | 0.0258857082524  |
| Ga17    | Chronic_gastritis | Weighted NSTI | 0.0266591487112  |
| Ga18    | Chronic_gastritis | Weighted NSTI | 0.0234975410995  |
| Ga19    | Chronic_gastritis | Weighted NSTI | 0.0275340254447  |
| Ga20    | Chronic_gastritis | Weighted NSTI | 0.0265223213943  |
| Ga21    | Chronic_gastritis | Weighted NSTI | 0.0237405518119  |
| Ga22    | Chronic_gastritis | Weighted NSTI | 0.0246237461481  |
| Ga23    | Chronic_gastritis | Weighted NSTI | 0.0261776323705  |
| Ga24    | Chronic_gastritis | Weighted NSTI | 0.0240216954059  |
| Ga25    | Chronic_gastritis | Weighted NSTI | 0.0216813543149  |
| Ga26    | Chronic_gastritis | Weighted NSTI | 0.0245844643959  |
| Ga27    | Chronic_gastritis | Weighted NSTI | 0.0236851326843  |
| Ga28    | Chronic_gastritis | Weighted NSTI | 0.0235497859161  |
| Ga29    | Chronic_gastritis | Weighted NSTI | 0.0276284179621  |
| Ga30    | Chronic_gastritis | Weighted NSTI | 0.0324789141807  |
| Ga31    | Chronic_gastritis | Weighted NSTI | 0.0235609158646  |
| Ga32    | Chronic_gastritis | Weighted NSTI | 0.0234512561062  |
| Ga33    | Chronic_gastritis | Weighted NSTI | 0.0258031842255  |
| Ga34    | Chronic_gastritis | Weighted NSTI | 0.0239299087937  |
| Ga35    | Chronic_gastritis | Weighted NSTI | 0.0276010614863  |
| Ga36    | Chronic_gastritis | Weighted NSTI | 0.0250065251942  |
| Ga37    | Chronic_gastritis | Weighted NSTI | 0.0233063614292  |
| Ga38    | Chronic_gastritis | Weighted NSTI | 0.0321749195517  |

|      |                   |               |                 |
|------|-------------------|---------------|-----------------|
| Ga39 | Chronic_gastritis | Weighted NSTI | 0.0233674455307 |
| Ga40 | Chronic_gastritis | Weighted NSTI | 0.0239810959362 |
| Ga41 | Chronic_gastritis | Weighted NSTI | 0.0231499448874 |
| Ga42 | Chronic_gastritis | Weighted NSTI | 0.0232485466453 |
| Ga43 | Chronic_gastritis | Weighted NSTI | 0.0265209393083 |
| Ga44 | Chronic_gastritis | Weighted NSTI | 0.0235484717435 |
| Ga45 | Chronic_gastritis | Weighted NSTI | 0.0236658097207 |
| Ga46 | Chronic_gastritis | Weighted NSTI | 0.0234256131336 |
| Ga47 | Chronic_gastritis | Weighted NSTI | 0.023129553295  |
| Ga48 | Chronic_gastritis | Weighted NSTI | 0.0248635470616 |
| Ga49 | Chronic_gastritis | Weighted NSTI | 0.0238738216243 |
| Ga50 | Chronic_gastritis | Weighted NSTI | 0.0234692827327 |
| Ga51 | Chronic_gastritis | Weighted NSTI | 0.0284928431634 |
| Ga52 | Chronic_gastritis | Weighted NSTI | 0.0232210470076 |
| Ga53 | Chronic_gastritis | Weighted NSTI | 0.0241237951842 |
| Ga54 | Chronic_gastritis | Weighted NSTI | 0.0249728754939 |
| Ga55 | Chronic_gastritis | Weighted NSTI | 0.0245525155737 |
| Ga56 | Chronic_gastritis | Weighted NSTI | 0.0247968261668 |
| Ga57 | Chronic_gastritis | Weighted NSTI | 0.0220259722126 |
| Ga58 | Chronic_gastritis | Weighted NSTI | 0.0235104559057 |
| Ga59 | Chronic_gastritis | Weighted NSTI | 0.0340624095354 |
| Ga60 | Chronic_gastritis | Weighted NSTI | 0.0248388022169 |
| Ga61 | Chronic_gastritis | Weighted NSTI | 0.0371165514265 |
| Ga62 | Chronic_gastritis | Weighted NSTI | 0.0315506630709 |
| Ga63 | Chronic_gastritis | Weighted NSTI | 0.0190374080374 |
| Ga64 | Chronic_gastritis | Weighted NSTI | 0.0255534901151 |
| Ga65 | Chronic_gastritis | Weighted NSTI | 0.0283541207743 |
| Ga66 | Chronic_gastritis | Weighted NSTI | 0.0243016108554 |
| Ga67 | Chronic_gastritis | Weighted NSTI | 0.0251248866666 |
| Ga68 | Chronic_gastritis | Weighted NSTI | 0.0329422136093 |
| Ga69 | Chronic_gastritis | Weighted NSTI | 0.0234692839506 |
| Ga70 | Chronic_gastritis | Weighted NSTI | 0.031955855137  |
| Ga71 | Chronic_gastritis | Weighted NSTI | 0.0231236853239 |
| Ga72 | Chronic_gastritis | Weighted NSTI | 0.0316024332108 |
| Ga73 | Chronic_gastritis | Weighted NSTI | 0.0290991240903 |
| Ga74 | Chronic_gastritis | Weighted NSTI | 0.0228351266279 |
| Ga75 | Chronic_gastritis | Weighted NSTI | 0.0244748764283 |
| Ga76 | Chronic_gastritis | Weighted NSTI | 0.0233080136803 |
| Ga77 | Chronic_gastritis | Weighted NSTI | 0.0232002651225 |
| Ga78 | Chronic_gastritis | Weighted NSTI | 0.0236748666552 |
| Ga79 | Chronic_gastritis | Weighted NSTI | 0.0408731774542 |
| Ga80 | Chronic_gastritis | Weighted NSTI | 0.0233605857388 |
| Ga81 | Chronic_gastritis | Weighted NSTI | 0.0286796217287 |

## Panel F.

| Weighted NSTI values for each microbiome sample predicted with 10 genera differentially abundant in the two patient groups (by LEfSe analysis): KO functions |                   |               |                  |
|--------------------------------------------------------------------------------------------------------------------------------------------------------------|-------------------|---------------|------------------|
| #Sample                                                                                                                                                      | Clinical setting  | Metric        | Value            |
| GC1                                                                                                                                                          | Gastric_carcinoma | Weighted NSTI | 0.00930809485847 |
| GC2                                                                                                                                                          | Gastric_carcinoma | Weighted NSTI | 0.0240044368429  |
| GC3                                                                                                                                                          | Gastric_carcinoma | Weighted NSTI | 0.0109010814095  |
| GC4                                                                                                                                                          | Gastric_carcinoma | Weighted NSTI | 0.0145213951541  |
| GC5                                                                                                                                                          | Gastric_carcinoma | Weighted NSTI | 0.023718870231   |
| GC6                                                                                                                                                          | Gastric_carcinoma | Weighted NSTI | 0.0293275862309  |
| GC7                                                                                                                                                          | Gastric_carcinoma | Weighted NSTI | 0.00497999715557 |
| GC8                                                                                                                                                          | Gastric_carcinoma | Weighted NSTI | 0.023024085928   |
| GC9                                                                                                                                                          | Gastric_carcinoma | Weighted NSTI | 0.0937727775039  |
| GC10                                                                                                                                                         | Gastric_carcinoma | Weighted NSTI | 0.0938399144357  |
| GC11                                                                                                                                                         | Gastric_carcinoma | Weighted NSTI | 0.0231372989755  |
| GC12                                                                                                                                                         | Gastric_carcinoma | Weighted NSTI | 0.0102467154304  |
| GC13                                                                                                                                                         | Gastric_carcinoma | Weighted NSTI | 0.0345476705214  |
| GC14                                                                                                                                                         | Gastric_carcinoma | Weighted NSTI | 0.00921013087128 |
| GC15                                                                                                                                                         | Gastric_carcinoma | Weighted NSTI | 0.0414846156894  |
| GC16                                                                                                                                                         | Gastric_carcinoma | Weighted NSTI | 0.0423956274665  |
| GC17                                                                                                                                                         | Gastric_carcinoma | Weighted NSTI | 0.0154562656542  |
| GC18                                                                                                                                                         | Gastric_carcinoma | Weighted NSTI | 0.0136105222154  |
| GC19                                                                                                                                                         | Gastric_carcinoma | Weighted NSTI | 0.0134520120571  |
| GC20                                                                                                                                                         | Gastric_carcinoma | Weighted NSTI | 0.0139521366017  |
| GC21                                                                                                                                                         | Gastric_carcinoma | Weighted NSTI | 0.0645339594707  |
| GC22                                                                                                                                                         | Gastric_carcinoma | Weighted NSTI | 0.0133382328625  |
| GC23                                                                                                                                                         | Gastric_carcinoma | Weighted NSTI | 0.0354155953905  |
| GC24                                                                                                                                                         | Gastric_carcinoma | Weighted NSTI | 0.0208627090301  |
| GC25                                                                                                                                                         | Gastric_carcinoma | Weighted NSTI | 0.0181078888419  |
| GC26                                                                                                                                                         | Gastric_carcinoma | Weighted NSTI | 0.0144427683349  |
| GC27                                                                                                                                                         | Gastric_carcinoma | Weighted NSTI | 0.0160166205041  |
| GC28                                                                                                                                                         | Gastric_carcinoma | Weighted NSTI | 0.0233542930185  |
| GC29                                                                                                                                                         | Gastric_carcinoma | Weighted NSTI | 0.025739929714   |
| GC30                                                                                                                                                         | Gastric_carcinoma | Weighted NSTI | 0.0113294205463  |
| GC31                                                                                                                                                         | Gastric_carcinoma | Weighted NSTI | 0.0148387168242  |
| GC32                                                                                                                                                         | Gastric_carcinoma | Weighted NSTI | 0.0260766868078  |
| GC33                                                                                                                                                         | Gastric_carcinoma | Weighted NSTI | 0.0804474660945  |
| GC34                                                                                                                                                         | Gastric_carcinoma | Weighted NSTI | 0.0157898849295  |
| GC35                                                                                                                                                         | Gastric_carcinoma | Weighted NSTI | 0.0367311418522  |
| GC36                                                                                                                                                         | Gastric_carcinoma | Weighted NSTI | 0.0141705107879  |
| GC37                                                                                                                                                         | Gastric_carcinoma | Weighted NSTI | 0.032360819261   |

|      |                   |               |                 |
|------|-------------------|---------------|-----------------|
| GC38 | Gastric_carcinoma | Weighted NSTI | 0.011977852744  |
| GC39 | Gastric_carcinoma | Weighted NSTI | 0.0181153823328 |
| GC40 | Gastric_carcinoma | Weighted NSTI | 0.0262472709806 |
| GC41 | Gastric_carcinoma | Weighted NSTI | 0.0164562967724 |
| GC42 | Gastric_carcinoma | Weighted NSTI | 0.0154662402134 |
| GC43 | Gastric_carcinoma | Weighted NSTI | 0.0381879853417 |
| GC44 | Gastric_carcinoma | Weighted NSTI | 0.0160909987093 |
| GC45 | Gastric_carcinoma | Weighted NSTI | 0.0218091017727 |
| GC46 | Gastric_carcinoma | Weighted NSTI | 0.0277717197922 |
| GC47 | Gastric_carcinoma | Weighted NSTI | 0.0368600029383 |
| GC48 | Gastric_carcinoma | Weighted NSTI | 0.0162168230646 |
| GC49 | Gastric_carcinoma | Weighted NSTI | 0.0152481813312 |
| GC50 | Gastric_carcinoma | Weighted NSTI | 0.0220793569132 |
| GC51 | Gastric_carcinoma | Weighted NSTI | 0.0233230434466 |
| GC52 | Gastric_carcinoma | Weighted NSTI | 0.0201161357312 |
| GC53 | Gastric_carcinoma | Weighted NSTI | 0.0202110531638 |
| GC54 | Gastric_carcinoma | Weighted NSTI | 0.0414352900421 |
| Ga1  | Chronic_gastritis | Weighted NSTI | 0.0308221809121 |
| Ga2  | Chronic_gastritis | Weighted NSTI | 0.0190175746876 |
| Ga3  | Chronic_gastritis | Weighted NSTI | 0.0222307471725 |
| Ga4  | Chronic_gastritis | Weighted NSTI | 0.0209507992895 |
| Ga5  | Chronic_gastritis | Weighted NSTI | 0.0319685746606 |
| Ga6  | Chronic_gastritis | Weighted NSTI | 0.0153921588649 |
| Ga7  | Chronic_gastritis | Weighted NSTI | 0.0217206904368 |
| Ga8  | Chronic_gastritis | Weighted NSTI | 0.0232925028465 |
| Ga9  | Chronic_gastritis | Weighted NSTI | 0.0247355306637 |
| Ga10 | Chronic_gastritis | Weighted NSTI | 0.0213686407209 |
| Ga11 | Chronic_gastritis | Weighted NSTI | 0.0233840454215 |
| Ga12 | Chronic_gastritis | Weighted NSTI | 0.0229725174811 |
| Ga13 | Chronic_gastritis | Weighted NSTI | 0.0236147972795 |
| Ga14 | Chronic_gastritis | Weighted NSTI | 0.0188148415636 |
| Ga15 | Chronic_gastritis | Weighted NSTI | 0.0239628754086 |
| Ga16 | Chronic_gastritis | Weighted NSTI | 0.0258857082524 |
| Ga17 | Chronic_gastritis | Weighted NSTI | 0.0266591487112 |
| Ga18 | Chronic_gastritis | Weighted NSTI | 0.0234975410995 |
| Ga19 | Chronic_gastritis | Weighted NSTI | 0.0275340254447 |
| Ga20 | Chronic_gastritis | Weighted NSTI | 0.0265223213943 |
| Ga21 | Chronic_gastritis | Weighted NSTI | 0.0237405518119 |
| Ga22 | Chronic_gastritis | Weighted NSTI | 0.0246237461481 |
| Ga23 | Chronic_gastritis | Weighted NSTI | 0.0261776323705 |
| Ga24 | Chronic_gastritis | Weighted NSTI | 0.0240216954059 |
| Ga25 | Chronic_gastritis | Weighted NSTI | 0.0216813543149 |
| Ga26 | Chronic_gastritis | Weighted NSTI | 0.0245844643959 |
| Ga27 | Chronic_gastritis | Weighted NSTI | 0.0236851326843 |
| Ga28 | Chronic_gastritis | Weighted NSTI | 0.0235497859161 |
| Ga29 | Chronic_gastritis | Weighted NSTI | 0.0276284179621 |
| Ga30 | Chronic_gastritis | Weighted NSTI | 0.0324789141807 |
| Ga31 | Chronic_gastritis | Weighted NSTI | 0.0235609158646 |
| Ga32 | Chronic_gastritis | Weighted NSTI | 0.0234512561062 |
| Ga33 | Chronic_gastritis | Weighted NSTI | 0.0258031842255 |
| Ga34 | Chronic_gastritis | Weighted NSTI | 0.0239299087937 |
| Ga35 | Chronic_gastritis | Weighted NSTI | 0.0276010614863 |
| Ga36 | Chronic_gastritis | Weighted NSTI | 0.0250065251942 |
| Ga37 | Chronic_gastritis | Weighted NSTI | 0.0233063614292 |
| Ga38 | Chronic_gastritis | Weighted NSTI | 0.0321749195517 |
| Ga39 | Chronic_gastritis | Weighted NSTI | 0.0233674455307 |
| Ga40 | Chronic_gastritis | Weighted NSTI | 0.0239810959362 |
| Ga41 | Chronic_gastritis | Weighted NSTI | 0.0231499448874 |
| Ga42 | Chronic_gastritis | Weighted NSTI | 0.0232485466453 |
| Ga43 | Chronic_gastritis | Weighted NSTI | 0.0265209393083 |
| Ga44 | Chronic_gastritis | Weighted NSTI | 0.0235484717435 |
| Ga45 | Chronic_gastritis | Weighted NSTI | 0.0236658097207 |
| Ga46 | Chronic_gastritis | Weighted NSTI | 0.0234256131336 |
| Ga47 | Chronic_gastritis | Weighted NSTI | 0.023129553295  |
| Ga48 | Chronic_gastritis | Weighted NSTI | 0.0248635470616 |
| Ga49 | Chronic_gastritis | Weighted NSTI | 0.0238738216243 |
| Ga50 | Chronic_gastritis | Weighted NSTI | 0.0234692827327 |
| Ga51 | Chronic_gastritis | Weighted NSTI | 0.0284928431634 |
| Ga52 | Chronic_gastritis | Weighted NSTI | 0.0232210470076 |
| Ga53 | Chronic_gastritis | Weighted NSTI | 0.0241237951842 |
| Ga54 | Chronic_gastritis | Weighted NSTI | 0.0249728754939 |
| Ga55 | Chronic_gastritis | Weighted NSTI | 0.0245525155737 |
| Ga56 | Chronic_gastritis | Weighted NSTI | 0.0247968261668 |
| Ga57 | Chronic_gastritis | Weighted NSTI | 0.0220259722126 |
| Ga58 | Chronic_gastritis | Weighted NSTI | 0.0235104559057 |
| Ga59 | Chronic_gastritis | Weighted NSTI | 0.0340624095354 |
| Ga60 | Chronic_gastritis | Weighted NSTI | 0.0248388022169 |
| Ga61 | Chronic_gastritis | Weighted NSTI | 0.0371165514265 |
| Ga62 | Chronic_gastritis | Weighted NSTI | 0.0315506630709 |
| Ga63 | Chronic_gastritis | Weighted NSTI | 0.0190374080374 |
| Ga64 | Chronic_gastritis | Weighted NSTI | 0.0255534901151 |

|      |                   |               |                 |
|------|-------------------|---------------|-----------------|
| Ga65 | Chronic_gastritis | Weighted NSTI | 0.0283541207743 |
| Ga66 | Chronic_gastritis | Weighted NSTI | 0.0243016108554 |
| Ga67 | Chronic_gastritis | Weighted NSTI | 0.0251248866666 |
| Ga68 | Chronic_gastritis | Weighted NSTI | 0.0329422136093 |
| Ga69 | Chronic_gastritis | Weighted NSTI | 0.0234692839506 |
| Ga70 | Chronic_gastritis | Weighted NSTI | 0.031955855137  |
| Ga71 | Chronic_gastritis | Weighted NSTI | 0.0231236853239 |
| Ga72 | Chronic_gastritis | Weighted NSTI | 0.0316024332108 |
| Ga73 | Chronic_gastritis | Weighted NSTI | 0.0290991240903 |
| Ga74 | Chronic_gastritis | Weighted NSTI | 0.0228351266279 |
| Ga75 | Chronic_gastritis | Weighted NSTI | 0.0244748764283 |
| Ga76 | Chronic_gastritis | Weighted NSTI | 0.0233080136803 |
| Ga77 | Chronic_gastritis | Weighted NSTI | 0.0232002651225 |
| Ga78 | Chronic_gastritis | Weighted NSTI | 0.0236748666552 |
| Ga79 | Chronic_gastritis | Weighted NSTI | 0.0408731774542 |
| Ga80 | Chronic_gastritis | Weighted NSTI | 0.0233605857388 |
| Ga81 | Chronic_gastritis | Weighted NSTI | 0.0286796217287 |

## SUPPLEMENTARY REFERENCES

- 1 van Doorn LJ, Figueiredo C, Rossau R, et al. Typing of *Helicobacter pylori* vacA gene and detection of cagA gene by PCR and reverse hybridization. *J Clin Microbiol* 1998;36:1271-6.
- 2 DeSantis TZ, Hugenholtz P, Larsen N, et al. Greengenes, a chimera-checked 16S rRNA gene database and workbench compatible with ARB. *Applied & Environmental Microbiology* 2006;72:5069-72.
- 3 Gevers D, Kugathasan S, Denson LA, et al. The treatment-naive microbiome in new-onset Crohn's disease. *Cell Host Microbe* 2014;15:382-92.
- 4 Langille MG, Zaneveld J, Caporaso JG, et al. Predictive functional profiling of microbial communities using 16S rRNA marker gene sequences. *Nat Biotechnol* 2013;31:814-21.
- 5 Parks DH, Tyson GW, Hugenholtz P, et al. STAMP: statistical analysis of taxonomic and functional profiles. *Bioinformatics* 2014;30:3123-4.
- 6 White JR, Nagarajan N, Pop M. Statistical methods for detecting differentially abundant features in clinical metagenomic samples. *PLoS Comput Biol* 2009;5:e1000352.
- 7 Walters WA, Caporaso JG, Lauber CL, et al. PrimerProspector: de novo design and taxonomic analysis of barcoded polymerase chain reaction primers. *Bioinformatics* 2011;27:1159-61.
- 8 Rinttila T, Kassinen A, Malinen E, et al. Development of an extensive set of 16S rDNA-targeted primers for quantification of pathogenic and indigenous bacteria in faecal samples by real-time PCR. *J Appl Microbiol* 2004;97:1166-77.
- 9 Horz HP, Vianna ME, Gomes BP, et al. Evaluation of universal probes and primer sets for assessing total bacterial load in clinical samples: general implications and practical use in endodontic antimicrobial therapy. *J Clin Microbiol* 2005;43:5332-7.
